# Supplementary material for: Antimalarial mechanism of action of the natural product 9-methoxystrobilurin G
Source: Royal Society of Chemistry journal article supplement (doi:10.1039/d4mo00088a), 2024-08-29

## Supporting Information

### Antimalarial mechanism of action of the natural product 9-methoxystrobilurin G

Philip J Shaw<sup>a†</sup>, Parichat Prommana<sup>a</sup>, Chawanee Thongpanchang<sup>a</sup>, Sumalee Kamchonwongpaisan<sup>a</sup>, Darin Kongkasuriyachai<sup>a</sup>, Yan Wang<sup>b</sup>, Zhihua Zhou<sup>b</sup>, Yiqing Zhou<sup>bc†</sup>.

<sup>a</sup>National Center for Genetic Engineering and Biotechnology (BIOTEC), National Science and Technology Development Agency (NSTDA), 113 Thailand Science Park, Phahonyothin Road, Khlong Nueng, Khlong Luang, Pathum Thani 12120, Thailand

<sup>b</sup>CAS-Key Laboratory of Synthetic Biology, CAS Center for Excellence in Molecular Plant Sciences, Chinese Academy of Sciences, Shanghai, 200032, China

<sup>c</sup>School of Biotechnology and Food Engineering, Changshu Institute of Technology, Suzhou 215500, China

#### Corresponding Authors:

<sup>†</sup>Email: philip@biotec.or.th (PJS); zhouyq@cslg.edu.cn (YZ).

#### Contents

|                                                                                                             |   |
|-------------------------------------------------------------------------------------------------------------|---|
| Table S1. Summary statistics of genome sequencing data. ....                                                | 2 |
| Table S2. Copy number variants (CNVs) among 9MG-resistant parasite clones.....                              | 2 |
| Table S3. Indel variants in protein coding genes among 9MG-resistant clones. ....                           | 3 |
| Table S4. Predicted free energies of ligands binding to <i>P. falciparum</i> CYTB receptors. ....           | 3 |
| Table S5. 9MG target proteins with significant abundance ratios from affinity pull-down.....                | 3 |
| Figure S1. <i>Ab initio</i> structure of wild-type <i>Plasmodium falciparum</i> cytochrome b (PfCYTB). .... | 9 |
| Figure S2. HRMS (ESI) and 1H NMR spectra for compound 9M-P. ....                                            | 9 |

**Table S1. Summary statistics of genome sequencing data.**

| Parasite   | Raw reads | <sup>1</sup> Pre-processed reads | <sup>2</sup> Aligned Reads | <sup>3</sup> Coverage | <sup>4</sup> SNP (all/PASS) | <sup>4</sup> Indel (all/PASS) |
|------------|-----------|----------------------------------|----------------------------|-----------------------|-----------------------------|-------------------------------|
| 3D7 parent | 9,729,178 | 9,617,168                        | 9,159,246                  | 59x                   | 140/90                      | 390/387                       |
| 3D7_1_G5   | 8,217,770 | 8,176,074                        | 7,774,453                  | 50x                   | 84/57                       | 206/206                       |
| 3D7_2_B6   | 7,722,548 | 7,675,696                        | 7,154,328                  | 46x                   | 130/103                     | 275/275                       |
| 3D7_3_E6   | 8,111,514 | 8,066,894                        | 6,699,813                  | 43x                   | 65/37                       | 177/177                       |
| Dd2 parent | 9,176,950 | 9,175,230                        | 7,016,891                  | 46x                   | 365/193                     | 640/404                       |
| Dd2_4_G5   | 8,646,382 | 8,621,016                        | 8,137,017                  | 54x                   | 162/93                      | 499/318                       |
| Dd2_1_F3   | 9,126,664 | 9,100,263                        | 9,001,302                  | 60x                   | 286/190                     | 942/627                       |

<sup>1</sup>Preprocessed reads remaining after fastp filtering.

<sup>2</sup>Reads aligned to reference genome.

<sup>3</sup>Coverage was calculated from the total bases sequenced in aligned reads and the genome size.

<sup>4</sup>Variants called by GATK.

**Table S2. Copy number variants (CNVs) among 9MG-resistant parasite clones.**

Genome sequencing data from the 3D7 and Dd2 parents and 9MG-resistant clonal lines of *P. falciparum* from independent selection experiments were analysed using the cn.mops tool. No CNVs were detected in Dd2 or clonal lines from this parent. Twelve CNVs were reported among 3D7 and clonal lines from this parent (3D7\_1\_G5, 3D7\_2\_B6, and 3D7\_3\_E6). The copy numbers in each parasite are indicated in columns 5–8.

| chromosome  | start   | end     | width (bp) | Parasite line |      |      |      |
|-------------|---------|---------|------------|---------------|------|------|------|
|             |         |         |            | 3D7           | 2_B6 | 3_E6 | 1_G5 |
| Pf3D7_01_v3 | 555001  | 575000  | 20000      | 2             | 1    | 1    | 1    |
| Pf3D7_02_v3 | 815001  | 830000  | 15000      | 2             | 1    | 1    | 1    |
| Pf3D7_03_v3 | 1       | 80000   | 80000      | 8             | 0    | 0    | 0    |
| Pf3D7_04_v3 | 960001  | 975000  | 15000      | 1             | 1    | 1    | 2    |
| Pf3D7_06_v3 | 465001  | 480000  | 15000      | 2             | 1    | 1    | 1    |
| Pf3D7_07_v3 | 1075001 | 1090000 | 15000      | 2             | 1    | 1    | 1    |
| Pf3D7_09_v3 | 1380001 | 1400000 | 20000      | 4             | 1    | 1    | 1    |
| Pf3D7_11_v3 | 125001  | 145000  | 20000      | 2             | 1    | 1    | 1    |

|             |         |         |       |   |   |   |   |
|-------------|---------|---------|-------|---|---|---|---|
| Pf3D7_11_v3 | 1935001 | 1950000 | 15000 | 2 | 1 | 1 | 1 |
| Pf3D7_11_v3 | 1985001 | 2000000 | 15000 | 2 | 1 | 1 | 1 |
| Pf3D7_13_v3 | 2910001 | 2925236 | 15236 | 1 | 0 | 1 | 1 |
| Pf3D7_14_v3 | 555001  | 570000  | 15000 | 2 | 1 | 1 | 1 |

**Table S3. Indel variants in protein coding genes among 9MG-resistant clones.**

| Gene ID       | MFS <sup>1</sup> | MIS <sup>2</sup> | 9MG-resistant clone |                |                |                      |                      |
|---------------|------------------|------------------|---------------------|----------------|----------------|----------------------|----------------------|
|               |                  |                  | 3D7_1_<br>G5        | 3D7_2_<br>B6   | 3D7_3_<br>E6   | Dd2_1_<br>F3         | Dd2_4_<br>G5         |
| PF3D7_1244400 | -2.897           | 0.149            | NNYNN<br>K480K      | NNYNN<br>K480K | NNYNN<br>K480K | No<br>change         | No change            |
| PF3D7_1118500 | -2.956           | 0.123            | D505R?              | D505R?         | D505R?         | No<br>change         | No change            |
| PF3D7_1348400 | -2.777           | 0.156            | No<br>change        | No<br>change   | No<br>change   | N507_D5<br>08insVPIN | N507_D50<br>8insVPIN |
| PF3D7_1229600 | -2.449           | 0.462            | No<br>change        | No<br>change   | No<br>change   | K31fs                | K31fs                |

<sup>1</sup>Gene mutagenesis fitness score.

<sup>2</sup>Gene mutagenesis index score.

**Table S4. Predicted free energies of ligands binding to *P. falciparum* CYTB receptors.**

| CYTB      | <sup>1</sup> 9MG | <sup>2</sup> ATQ |
|-----------|------------------|------------------|
| Wild-type | -8.1             | -9.6             |
| Y126C     | -7.8             | -9.5             |
| G131S     | -7.8             | -9.6             |
| V259L     | -7.7             | -9.7             |
| F267C     | -7.6             | -9.1             |

<sup>1</sup>Top-ranked pose 9-methoxytribilurin G (kcal/mol) reported by Autodock Vina 1.2.0.

<sup>2</sup>Second top-ranked pose Atovaquone (kcal/mol) reported by Autodock Vina 1.2.0.

**Table S5. 9MG target proteins with significant abundance ratios from affinity pull-down.**

| Gene ID           | Log2-Re  | Log2-Rc  | Product Description                                         | GeneSymbol | MW<br>(kDa) |
|-------------------|----------|----------|-------------------------------------------------------------|------------|-------------|
| PF3D7_062260<br>0 | 6.643856 | 2.664837 | cytochrome b-c1 complex<br>subunit 9, putative              | QCR9       | 11.7        |
| PF3D7_143500<br>0 | 6.643856 | 1.168779 | cytochrome c oxidase<br>assembly protein COX15,<br>putative | COX15      | 50.4        |

|                   |          |          |                                                                   |         |       |
|-------------------|----------|----------|-------------------------------------------------------------------|---------|-------|
| PF3D7_101230<br>0 | 6.643856 | 1.016332 | cytochrome b-c1 complex<br>subunit 7, putative                    | QCR7    | 23.0  |
| PF3D7_140940<br>0 | 5.601859 | 4.425695 | conserved protein, unknown<br>function                            | N/A     | 30.5  |
| PF3D7_041720<br>0 | 5.479393 | 4.401933 | bifunctional dihydrofolate<br>reductase-thymidylate synthase      | DHFR-TS | 71.7  |
| PF3D7_031280<br>0 | 4.014295 | 3.432586 | 60S ribosomal protein L26,<br>putative                            | N/A     | 14.8  |
| PF3D7_082290<br>0 | 4.334338 | 3.39004  | PhIL1-interacting candidate<br>PIC2                               | PIC2    | 138   |
| PF3D7_121140<br>0 | 6.643856 | 3.308097 | heat shock protein DNAJ<br>homologue Pfj4                         | PfJ4    | 28.1  |
| PF3D7_122340<br>0 | 4.508444 | 3.293279 | phospholipid-transporting<br>ATPase, putative                     | N/A     | 190   |
| PF3D7_060870<br>0 | 2.192045 | 2.94421  | T-complex protein 1 subunit<br>zeta                               | CCT6    | 61.5  |
| PF3D7_120620<br>0 | 2.537345 | 2.906179 | eukaryotic translation initiation<br>factor 3 subunit C, putative | EIF3C   | 116   |
| PF3D7_030550<br>0 | 4.419997 | 2.896421 | protein dopey homolog,<br>putative                                | N/A     | 468   |
| PF3D7_010630<br>0 | 2.745472 | 2.801665 | calcium-transporting ATPase                                       | ATP6    | 139   |
| PF3D7_146630<br>0 | 2.323339 | 2.771092 | 26S proteasome regulatory<br>subunit RPN2, putative               | RPN2    | 133   |
| PF3D7_061800<br>0 | 6.75884  | 2.714107 | conserved Plasmodium<br>membrane protein, unknown<br>function     | N/A     | 92.8  |
| PF3D7_082100<br>0 | 4.474433 | 2.698633 | conserved Plasmodium<br>protein, unknown function                 | N/A     | 60.5  |
| PF3D7_135250<br>0 | 4.908529 | 2.685306 | thioredoxin-related protein,<br>putative                          | N/A     | 24.08 |
| PF3D7_110860<br>0 | 2.526357 | 2.674541 | endoplasmic reticulum-<br>resident calcium binding<br>protein     | ERC     | 39.4  |
| PF3D7_040540<br>0 | 2.382838 | 2.507735 | pre-mRNA-processing-<br>splicing factor 8, putative               | PRPF8   | 366   |
| PF3D7_134260<br>0 | 2.295946 | 2.414185 | myosin A                                                          | MyoA    | 92.3  |

|                   |          |          |                                                            |            |      |
|-------------------|----------|----------|------------------------------------------------------------|------------|------|
| PF3D7_051260<br>0 | 2.04412  | 2.411633 | ras-related protein Rab-1B                                 | RAB1b      | 22.9 |
| PF3D7_144790<br>0 | 2.12688  | 2.343524 | multidrug resistance protein 2                             | MDR2       | 119  |
| PF3D7_141070<br>0 | 4.6932   | 2.33219  | conserved protein, unknown function                        | N/A        | 39.8 |
| PF3D7_101690<br>0 | 2.055426 | 2.32854  | early transcribed membrane protein 10.3                    | ETRAMP10.3 | 12.0 |
| PF3D7_030640<br>0 | 5.000926 | 2.316118 | FAD-dependent glycerol-3-phosphate dehydrogenase, putative | N/A        | 74.7 |
| PF3D7_135390<br>0 | 2.501206 | 2.306833 | proteasome subunit alpha type-7, putative                  | N/A        | 27.2 |
| PF3D7_135320<br>0 | 2.300332 | 2.276241 | membrane associated histidine-rich protein 2               | MAHRP2     | 15.8 |
| PF3D7_052300<br>0 | 3.744632 | 2.264318 | multidrug resistance protein 1                             | MDR1       | 162  |
| PF3D7_072040<br>0 | 2.356379 | 2.241959 | apoptosis-inducing factor, putative                        | AIF        | 72.7 |
| PF3D7_082440<br>0 | 2.531873 | 2.207867 | nucleoside transporter 2                                   | NT2        | 67.6 |
| PF3D7_092260<br>0 | 3.713577 | 2.131367 | glutamine synthetase                                       | N/A        | 63.2 |
| PF3D7_070250<br>0 | 5.777655 | 2.076488 | Plasmodium exported protein, unknown function              | N/A        | 27.7 |
| PF3D7_080180<br>0 | 2.676273 | 2.064931 | mannose-6-phosphate isomerase, putative                    | N/A        | 117  |
| PF3D7_091910<br>0 | 3.150463 | 2.063572 | DnaJ protein, putative                                     | N/A        | 43.3 |
| PF3D7_114250<br>0 | 2.470842 | 2.023057 | 60S ribosomal protein L28                                  | RPL28      | 14.4 |
| PF3D7_031250<br>0 | 6.643856 | 2.016601 | multidrug-resistant modulator MFR3                         | MFR3       | 67.8 |
| PF3D7_091420<br>0 | 6.643856 | 1.968535 | phospholipid or glycerol acyltransferase, putative         | N/A        | 49.3 |
| PF3D7_021400<br>0 | 2.882198 | 1.962697 | T-complex protein 1 subunit theta                          | CCT8       | 61.0 |

|                   |          |          |                                                  |           |      |
|-------------------|----------|----------|--------------------------------------------------|-----------|------|
| PF3D7_130620<br>0 | 4.547325 | 1.923888 | conserved protein, unknown<br>function           | N/A       | 56.8 |
| PF3D7_141390<br>0 | 6.643856 | 1.920439 | DnaJ protein, putative                           | N/A       | 45.2 |
| PF3D7_136180<br>0 | 3.267003 | 1.912002 | glideosome-associated<br>connector               | GAC       | 291  |
| PF3D7_141920<br>0 | 5.465976 | 1.906033 | thioredoxin-like protein,<br>putative            | ATrx1     | 80.2 |
| PF3D7_145700<br>0 | 4.622241 | 1.899937 | signal peptide peptidase                         | SPP       | 47.6 |
| PF3D7_072780<br>0 | 4.395658 | 1.877485 | cation transporting ATPase,<br>putative          | N/A       | 22.5 |
| PF3D7_145010<br>0 | 3.438976 | 1.872395 | signal recognition particle<br>subunit SRP54     | SRP54     | 56.0 |
| PF3D7_133830<br>0 | 4.609773 | 1.865624 | elongation factor 1-gamma,<br>putative           | EF-1gamma | 47.8 |
| PF3D7_090490<br>0 | 2.544133 | 1.853713 | copper-transporting ATPase                       | CuTP      | 299  |
| PF3D7_091540<br>0 | 3.873423 | 1.845214 | ATP-dependent 6-<br>phosphofructokinase          | PFK9      | 159  |
| PF3D7_083170<br>0 | 2.518524 | 1.836483 | heat shock protein 70                            | HSP70x    | 75.0 |
| PF3D7_050100<br>0 | 2.123834 | 1.812537 | Plasmodium exported protein,<br>unknown function | N/A       | 30.7 |
| PF3D7_141610<br>0 | 2.820481 | 1.805644 | protein SEY1, putative                           | SEY1      | 110  |
| PF3D7_052750<br>0 | 2.015757 | 1.786886 | Hsc70-interacting protein                        | HIP       | 51.1 |
| PF3D7_143810<br>0 | 3.197067 | 1.783303 | translocation protein SEC62,<br>putative         | SEC62     | 43.9 |
| PF3D7_102960<br>0 | 2.515876 | 1.722246 | adenosine deaminase                              | ADA       | 42.5 |
| PF3D7_112900<br>0 | 4.408059 | 1.708941 | spermidine synthase                              | SPDS      | 36.6 |
| PF3D7_135140<br>0 | 2.520006 | 1.706825 | 60S ribosomal protein L17,<br>putative           | N/A       | 23.4 |

|                   |          |          |                                                                |        |        |
|-------------------|----------|----------|----------------------------------------------------------------|--------|--------|
| PF3D7_142370<br>0 | 2.157608 | 1.702477 | NTF2-like domain-containing protein, putative                  | N/A    | 183    |
| PF3D7_030290<br>0 | 4.212225 | 1.682469 | exportin-1, putative                                           | N/A    | 148    |
| PF3D7_134480<br>0 | 3.833956 | 1.61589  | aspartate carbamoyltransferase                                 | ATCase | 43.3   |
| PF3D7_144230<br>0 | 6.643856 | 1.612855 | tRNA import protein tRIP                                       | tRIP   | 46.4   |
| PF3D7_061680<br>0 | 3.686327 | 1.58392  | malate:quinone oxidoreductase                                  | MQO    | 59.5   |
| PF3D7_102140<br>0 | 4.126029 | 1.561551 | endomembrane protein 70, putative                              | N/A    | 72.5   |
| PF3D7_060450<br>0 | 2.354691 | 1.554894 | GYF domain-containing protein, putative                        | N/A    | 334    |
| PF3D7_051570<br>0 | 3.413757 | 1.551349 | glideosome-associated protein 40                               | GAP40  | 51.8   |
| PF3D7_133130<br>0 | 3.07946  | 1.510493 | signal peptidase complex catalytic subunit SEC11               | SEC11  | 21.1   |
| PF3D7_061210<br>0 | 2.36085  | 1.470113 | eukaryotic translation initiation factor 3 subunit L, putative | EIF3L  | 78.129 |
| PF3D7_123560<br>0 | 2.223538 | 1.457757 | serine hydroxymethyltransferase                                | SHMT   | 49.8   |
| PF3D7_136270<br>0 | 2.446947 | 1.452309 | conserved Plasmodium protein, unknown function                 | N/A    | 242    |
| PF3D7_070970<br>0 | 2.39187  | 1.449337 | prodrug activation and resistance esterase                     | PARE   | 42.4   |
| PF3D7_053230<br>0 | 2.482806 | 1.440916 | Plasmodium exported protein (PHISTb), unknown function         | N/A    | 60.2   |
| PF3D7_145680<br>0 | 2.047686 | 1.437117 | V-type H(+)-translocating pyrophosphatase, putative            | VP1    | 76.4   |
| PF3D7_111670<br>0 | 2.057354 | 1.408477 | dipeptidyl aminopeptidase 1                                    | DPAP1  | 80.4   |
| PF3D7_140560<br>0 | 6.643856 | 1.398309 | ribonucleoside-diphosphate reductase small chain, putative     | RNR    | 40.6   |
| PF3D7_081120<br>0 | 2.22267  | 1.379769 | ER membrane protein complex subunit 1, putative                | EMC1   | 134    |

|                   |          |          |                                                       |         |      |
|-------------------|----------|----------|-------------------------------------------------------|---------|------|
| PF3D7_120430<br>0 | 3.976124 | 1.358605 | eukaryotic translation initiation factor 5A           | EIF5A   | 17.6 |
| PF3D7_111730<br>0 | 3.531225 | 1.348071 | conserved protein, unknown function                   | N/A     | 15.3 |
| PF3D7_100880<br>0 | 2.062661 | 1.335456 | nucleolar protein 5, putative                         | NOP5    | 53.4 |
| PF3D7_091040<br>0 | 3.326237 | 1.330041 | selenide water dikinase, putative                     | N/A     | 140  |
| PF3D7_121620<br>0 | 2.397081 | 1.329268 | glycerol-3-phosphate dehydrogenase [NAD(+)], putative | N/A     | 41.2 |
| PF3D7_052400<br>0 | 3.002223 | 1.305399 | karyopherin beta                                      | KASbeta | 127  |
| PF3D7_142980<br>0 | 2.209088 | 1.290911 | coatomer subunit beta, putative                       | N/A     | 160  |
| PF3D7_123880<br>0 | 4.005243 | 1.276177 | acyl-CoA synthetase                                   | ACS11   | 92.1 |
| PF3D7_147120<br>0 | 4.803027 | 1.27171  | inorganic anion exchanger, inorganic anion antiporter | SulP    | 75.5 |
| PF3D7_122310<br>0 | 2.495274 | 1.26787  | cAMP-dependent protein kinase regulatory subunit      | PKAr    | 50.8 |
| PF3D7_041430<br>0 | 5.418259 | 1.247838 | Rab5-interacting protein, putative                    | N/A     | 13.2 |
| PF3D7_040560<br>0 | 2.876851 | 1.246448 | TMEM33 domain-containing protein, putative            | N/A     | 37.8 |
| PF3D7_093280<br>0 | 3.3612   | 1.232008 | importin alpha re-exporter, putative                  | CSE1    | 159  |
| PF3D7_146190<br>0 | 3.155645 | 1.229964 | valine--tRNA ligase, putative                         | N/A     | 128  |
| PF3D7_080200<br>0 | 2.65922  | 1.227006 | glutamate dehydrogenase, putative                     | GDH3    | 160  |
| PF3D7_101470<br>0 | 6.643856 | 1.214198 | prohibitin 2                                          | PHB2    | 34.8 |
| PF3D7_124280<br>0 | 2.011894 | 1.205719 | rab specific GDP dissociation inhibitor               | rabGDI  | 52.3 |
| PF3D7_146870<br>0 | 2.356969 | 1.205527 | eukaryotic initiation factor 4A                       | eIF4A   | 45.3 |



|                   |          |          |                                                                |         |      |
|-------------------|----------|----------|----------------------------------------------------------------|---------|------|
| PF3D7_110580<br>0 | 3.88338  | 1.198138 | conserved Apicomplexan protein, unknown function               | N/A     | 30.7 |
| PF3D7_132510<br>0 | 2.101956 | 1.188305 | phosphoribosylpyrophosphate synthetase                         | N/A     | 49.4 |
| PF3D7_110570<br>0 | 2.343411 | 1.180779 | tRNA-splicing ligase RtcB, putative                            | RTCB    | 56.3 |
| PF3D7_141250<br>0 | 6.643856 | 1.170925 | actin II                                                       | ACT2    | 42.6 |
| PF3D7_121200<br>0 | 6.643856 | 1.165314 | glutathione peroxidase-like thioredoxin peroxidase             | TPx(Gl) | 24.0 |
| PF3D7_143980<br>0 | 2.246447 | 1.164797 | vesicle-associated membrane protein, putative                  | N/A     | 27.7 |
| PF3D7_020470<br>0 | 3.681436 | 1.157234 | hexose transporter                                             | HT1     | 56.4 |
| PF3D7_132340<br>0 | 2.767892 | 1.138535 | 60S ribosomal protein L23                                      | RPL23   | 22.1 |
| PF3D7_042460<br>0 | 2.831391 | 1.134971 | Plasmodium exported protein (PHISTb)                           | N/A     | 36.0 |
| PF3D7_070740<br>0 | 3.220294 | 1.108446 | ATPase family AAA domain-containing protein 3A, putative       | ATAD3A  | 78.2 |
| PF3D7_081060<br>0 | 2.056556 | 1.105652 | ATP-dependent RNA helicase DBP1, putative                      | DBP1    | 108  |
| PF3D7_135780<br>0 | 2.097063 | 1.09305  | T-complex protein 1 subunit delta                              | CCT4    | 58.0 |
| PF3D7_133810<br>0 | 2.33467  | 1.057231 | 26S proteasome regulatory subunit RPN3, putative               | RPN3    | 59.1 |
| PF3D7_123040<br>0 | 6.643856 | 1.037119 | ATP-dependent protease subunit ClpQ                            | ClpQ    | 22.9 |
| PF3D7_051360<br>0 | 3.183048 | 1.032676 | deoxyribodipyrimidine photolyase, putative                     | N/A     | 129  |
| PF3D7_102190<br>0 | 2.565913 | 1.029863 | PHAX domain-containing protein, putative                       | N/A     | 267  |
| PF3D7_120100<br>0 | 2.068073 | 1.024507 | Plasmodium exported protein (PHISTb), unknown function         | N/A     | 77.1 |
| PF3D7_121270<br>0 | 2.144606 | 1.019925 | eukaryotic translation initiation factor 3 subunit A, putative | EIF3A   | 166  |

|                   |          |          |                                        |       |      |
|-------------------|----------|----------|----------------------------------------|-------|------|
| PF3D7_100400<br>0 | 2.111574 | 1.019904 | 60S ribosomal protein L13,<br>putative | N/A   | 23.8 |
| PF3D7_101290<br>0 | 2.20428  | 1.018212 | autophagy-related protein 18           | ATG18 | 43.5 |
| PF3D7_147110<br>0 | 2.691135 | 1.016749 | exported protein 2                     | EXP2  | 33.4 |
| PF3D7_135450<br>0 | 6.643856 | 1.011391 | adenylosuccinate synthetase            | ADSS  | 50.0 |

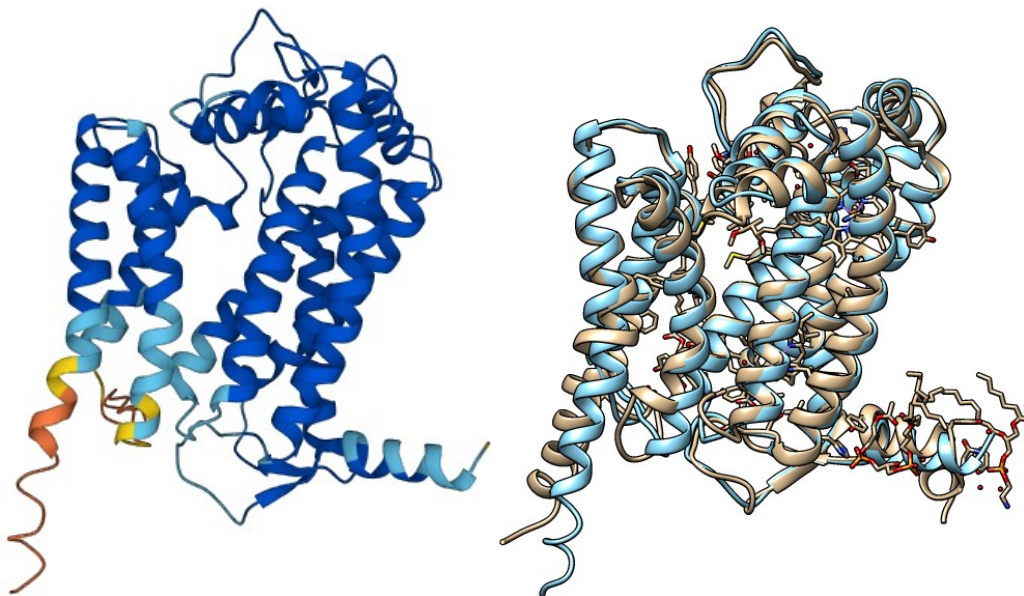

**Figure S1. *Ab initio* structure of wild-type *Plasmodium falciparum* cytochrome b (PfCYTB).**

The AlphaFold v2.0 *ab initio* structure determined for PfCYTB (Uniprot: Q7HP03) is shown on the left. Residues are colored according to model confidence: dark blue, very high (pLDDT per residue confidence score > 90); cyan, confident (90 > pLDDT > 70); yellow, low (70 > pLDDT > 50), and red, very low (pLDDT < 50). On the right, the *ab initio* PfCYTB structure (cyan) was superposed with

*Saccharomyces cerevisiae* yeast CYTB in the yeast bc1 complex X-ray structure solved to 1.9 Angstrom resolution (PDB: 3CX5; chain C CYTB protein in brown, other proteins in the complex have been removed for clarity).

Figure S2. HRMS (ESI) and 1H NMR spectra for compound 9M-P.

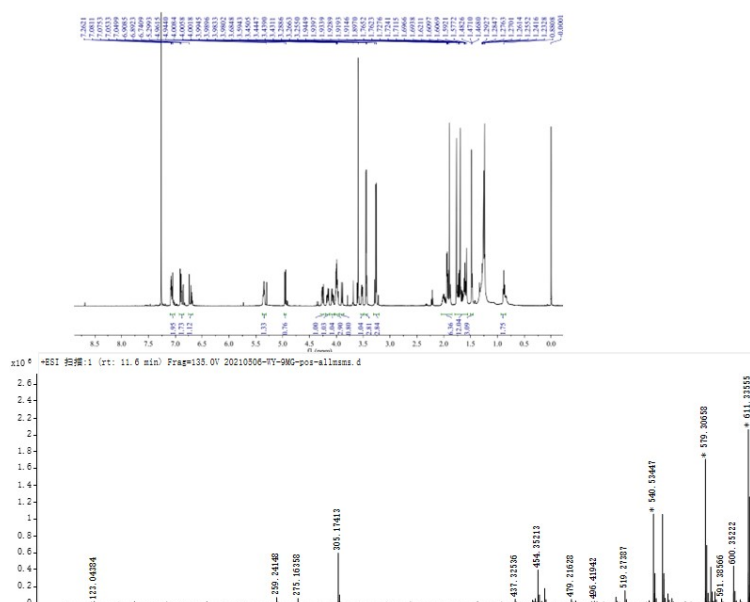

Supplement: d4mo00088a2.pdf [file d4mo00088a2.pdf]
