# Supplementary material for: Antimalarial mechanism of action of the natural product 9-methoxystrobilurin G
Source: Royal Society of Chemistry journal article supplement (doi:10.1039/d4mo00088a), 2024-08-29
Supplement: d4mo00088a1.xlsx [file d4mo00088a1.xlsx]

## Sheet: S1_Data
Parasite	Concentration	% Proliferation of control
3D7	5e-07	6.89311
3D7	2.5e-07	8.29171
3D7	1.25e-07	7.89211
3D7	6.25e-08	14.8851
3D7	3.13e-08	11.0889
3D7	1.56e-08	19.4805
3D7	7.81e-09	23.6763
3D7	3.91e-09	46.2537
3D7	1.95e-09	45.8541
3D7	9.77e-10	92.4076
3D7	4.88e-10	95.4046
3D7	2.44e-10	93.8062
3D7	1.22e-10	100.799
3D7	6.1e-11	95.4046
3D7	3.05e-11	95.6044
3D7	1.53e-11	95.8042
3D7	5e-07	0.808625
3D7	2.5e-07	4.04313
3D7	1.25e-07	-1.34771
3D7	6.25e-08	6.19946
3D7	3.13e-08	5.12129
3D7	1.56e-08	21.8329
3D7	7.81e-09	-0.808625
3D7	3.91e-09	25.0674
3D7	1.95e-09	37.4663
3D7	9.77e-10	75.7412
3D7	4.88e-10	78.9757
3D7	2.44e-10	101.617
3D7	1.22e-10	140.431
3D7	6.1e-11	108.086
3D7	3.05e-11	109.164
3D7	1.53e-11	98.9218
3D7	5e-07	18.8929
3D7	2.5e-07	14.8014
3D7	1.25e-07	16.2455
3D7	6.25e-08	15.0421
3D7	3.13e-08	16.2455
3D7	1.56e-08	15.7641
3D7	7.81e-09	14.8014
3D7	3.91e-09	29.4826
3D7	1.95e-09	23.225
3D7	9.77e-10	38.1468
3D7	4.88e-10	48.7365
3D7	2.44e-10	75.2106
3D7	1.22e-10	98.3153
3D7	6.1e-11	95.6679
3D7	3.05e-11	96.6306
3D7	1.53e-11	89.651
3D7	5e-07	20.1985
3D7	2.5e-07	18.1141
3D7	1.25e-07	23.7717
3D7	6.25e-08	28.3375
3D7	3.13e-08	17.8164
3D7	1.56e-08	17.3201
3D7	7.81e-09	24.268
3D7	3.91e-09	55.4342
3D7	1.95e-09	52.1588
3D7	9.77e-10	77.2705
3D7	4.88e-10	86.402
3D7	2.44e-10	89.6774
3D7	1.22e-10	93.5484
3D7	6.1e-11	89.1811
3D7	3.05e-11	92.8536
3D7	1.53e-11	103.97
3D7_1_G5	5e-07	14.0558
3D7_1_G5	2.5e-07	14.4345
3D7_1_G5	1.25e-07	17.6526
3D7_1_G5	6.25e-08	17.7473
3D7_1_G5	3.13e-08	26.5499
3D7_1_G5	1.56e-08	44.8178
3D7_1_G5	7.81e-09	72.8348
3D7_1_G5	3.91e-09	101.893
3D7_1_G5	1.95e-09	107.194
3D7_1_G5	9.77e-10	108.519
3D7_1_G5	4.88e-10	109.181
3D7_1_G5	2.44e-10	111.453
3D7_1_G5	1.22e-10	112.494
3D7_1_G5	6.1e-11	111.737
3D7_1_G5	3.05e-11	111.169
3D7_1_G5	1.53e-11	102.461
3D7_1_G5	5e-07	2.09677
3D7_1_G5	2.5e-07	-1.6129
3D7_1_G5	1.25e-07	9.19355
3D7_1_G5	6.25e-08	10
3D7_1_G5	3.13e-08	24.1935
3D7_1_G5	1.56e-08	55.9677
3D7_1_G5	7.81e-09	61.9355
3D7_1_G5	3.91e-09	69.0323
3D7_1_G5	1.95e-09	101.774
3D7_1_G5	9.77e-10	95.3226
3D7_1_G5	4.88e-10	85.8065
3D7_1_G5	2.44e-10	88.3871
3D7_1_G5	1.22e-10	89.1935
3D7_1_G5	6.1e-11	85
3D7_1_G5	3.05e-11	86.9355
3D7_1_G5	1.53e-11	82.4194
3D7_1_G5	5e-07	14.5803
3D7_1_G5	2.5e-07	13.8439
3D7_1_G5	1.25e-07	15.3166
3D7_1_G5	6.25e-08	15.4639
3D7_1_G5	3.13e-08	22.0913
3D7_1_G5	1.56e-08	42.4153
3D7_1_G5	7.81e-09	60.972
3D7_1_G5	3.91e-09	72.9013
3D7_1_G5	1.95e-09	89.838
3D7_1_G5	9.77e-10	87.9234
3D7_1_G5	4.88e-10	88.8071
3D7_1_G5	2.44e-10	88.3652
3D7_1_G5	1.22e-10	91.3108
3D7_1_G5	6.1e-11	87.187
3D7_1_G5	3.05e-11	86.8925
3D7_1_G5	1.53e-11	80.8542
3D7_1_G5	5e-07	3.49398
3D7_1_G5	2.5e-07	1.80723
3D7_1_G5	1.25e-07	5.18072
3D7_1_G5	6.25e-08	7.22892
3D7_1_G5	3.13e-08	19.5181
3D7_1_G5	1.56e-08	47.5904
3D7_1_G5	7.81e-09	77.8313
3D7_1_G5	3.91e-09	79.1566
3D7_1_G5	1.95e-09	98.7952
3D7_1_G5	9.77e-10	94.2169
3D7_1_G5	4.88e-10	96.2651
3D7_1_G5	2.44e-10	108.554
3D7_1_G5	1.22e-10	97.3494
3D7_1_G5	6.1e-11	95.6627
3D7_1_G5	3.05e-11	97.5904
3D7_1_G5	1.53e-11	91.3253
3D7_2_B6	5e-07	18.9091
3D7_2_B6	2.5e-07	18.0606
3D7_2_B6	1.25e-07	27.6364
3D7_2_B6	6.25e-08	21.8182
3D7_2_B6	3.13e-08	55.3939
3D7_2_B6	1.56e-08	78.303
3D7_2_B6	7.81e-09	86.6667
3D7_2_B6	3.91e-09	83.5152
3D7_2_B6	1.95e-09	104.97
3D7_2_B6	9.77e-10	99.3939
3D7_2_B6	4.88e-10	100.727
3D7_2_B6	2.44e-10	103.636
3D7_2_B6	1.22e-10	100.848
3D7_2_B6	6.1e-11	96.8485
3D7_2_B6	3.05e-11	96
3D7_2_B6	1.53e-11	94.7879
3D7_2_B6	5e-07	2.6738
3D7_2_B6	2.5e-07	4.38503
3D7_2_B6	1.25e-07	27.4866
3D7_2_B6	6.25e-08	30.6952
3D7_2_B6	3.13e-08	87.5936
3D7_2_B6	1.56e-08	96.7914
3D7_2_B6	7.81e-09	98.0749
3D7_2_B6	3.91e-09	88.877
3D7_2_B6	1.95e-09	94.0107
3D7_2_B6	9.77e-10	98.9305
3D7_2_B6	4.88e-10	99.7861
3D7_2_B6	2.44e-10	104.278
3D7_2_B6	1.22e-10	100
3D7_2_B6	6.1e-11	98.5027
3D7_2_B6	3.05e-11	99.1444
3D7_2_B6	1.53e-11	78.3957
3D7_2_B6	5e-07	11.4512
3D7_2_B6	2.5e-07	12.2449
3D7_2_B6	1.25e-07	18.4807
3D7_2_B6	6.25e-08	19.0476
3D7_2_B6	3.13e-08	41.3832
3D7_2_B6	1.56e-08	61.9048
3D7_2_B6	7.81e-09	76.7574
3D7_2_B6	3.91e-09	99.3197
3D7_2_B6	1.95e-09	91.61
3D7_2_B6	9.77e-10	92.0635
3D7_2_B6	4.88e-10	93.5374
3D7_2_B6	2.44e-10	97.7324
3D7_2_B6	1.22e-10	97.0522
3D7_2_B6	6.1e-11	98.0726
3D7_2_B6	3.05e-11	97.619
3D7_2_B6	1.53e-11	96.8254
3D7	5e-07	-1.44681
3D7	2.5e-07	-1.95745
3D7	1.25e-07	-2.97872
3D7	6.25e-08	-3.14894
3D7	3.13e-08	-0.0851064
3D7	1.56e-08	-0.425532
3D7	7.81e-09	-1.78723
3D7	3.91e-09	15.4043
3D7	1.95e-09	64.9362
3D7	9.77e-10	90.2979
3D7	4.88e-10	93.5319
3D7	2.44e-10	102.383
3D7	1.22e-10	100.511
3D7	6.1e-11	99.3191
3D7	3.05e-11	99.6596
3D7	1.53e-11	99.1489
3D7	5e-07	-3.15279
3D7	2.5e-07	-5.41633
3D7	1.25e-07	-4.44624
3D7	6.25e-08	-3.9612
3D7	3.13e-08	-4.93129
3D7	1.56e-08	-2.82943
3D7	7.81e-09	-3.47615
3D7	3.91e-09	51.4956
3D7	1.95e-09	58.6095
3D7	9.77e-10	82.3767
3D7	4.88e-10	87.7122
3D7	2.44e-10	97.5748
3D7	1.22e-10	98.7065
3D7	6.1e-11	99.6766
3D7	3.05e-11	98.5449
3D7	1.53e-11	99.515
3D7	5e-07	8.54573
3D7	2.5e-07	3.5982
3D7	1.25e-07	3.29835
3D7	6.25e-08	3.89805
3D7	3.13e-08	3.14843
3D7	1.56e-08	3.5982
3D7	7.81e-09	5.997
3D7	3.91e-09	17.991
3D7	1.95e-09	32.8336
3D7	9.77e-10	54.7226
3D7	4.88e-10	83.3583
3D7	2.44e-10	83.958
3D7	1.22e-10	92.2039
3D7	6.1e-11	87.5562
3D7	3.05e-11	89.5052
3D7	1.53e-11	69.5652
3D7_3_E6	5e-07	38.9831
3D7_3_E6	2.5e-07	32.5424
3D7_3_E6	1.25e-07	35.5932
3D7_3_E6	6.25e-08	35.9322
3D7_3_E6	3.13e-08	40
3D7_3_E6	1.56e-08	39.661
3D7_3_E6	7.81e-09	54.9153
3D7_3_E6	3.91e-09	94.2373
3D7_3_E6	1.95e-09	93.2203
3D7_3_E6	9.77e-10	88.1356
3D7_3_E6	4.88e-10	90.1695
3D7_3_E6	2.44e-10	95.5932
3D7_3_E6	1.22e-10	104.068
3D7_3_E6	6.1e-11	95.2542
3D7_3_E6	3.05e-11	97.9661
3D7_3_E6	1.53e-11	101.017
3D7_3_E6	5e-07	13.9944
3D7_3_E6	2.5e-07	11.9555
3D7_3_E6	1.25e-07	13.4384
3D7_3_E6	6.25e-08	12.6969
3D7_3_E6	3.13e-08	15.1066
3D7_3_E6	1.56e-08	31.6033
3D7_3_E6	7.81e-09	52.3633
3D7_3_E6	3.91e-09	52.3633
3D7_3_E6	1.95e-09	83.1325
3D7_3_E6	9.77e-10	81.4643
3D7_3_E6	4.88e-10	87.3957
3D7_3_E6	2.44e-10	92.215
3D7_3_E6	1.22e-10	92.0297
3D7_3_E6	6.1e-11	91.8443
3D7_3_E6	3.05e-11	92.9564
3D7_3_E6	1.53e-11	97.2196
3D7_3_E6	5e-07	28.1395
3D7_3_E6	2.5e-07	24.186
3D7_3_E6	1.25e-07	23.2558
3D7_3_E6	6.25e-08	24.4186
3D7_3_E6	3.13e-08	30.6977
3D7_3_E6	1.56e-08	41.1628
3D7_3_E6	7.81e-09	62.093
3D7_3_E6	3.91e-09	81.3953
3D7_3_E6	1.95e-09	87.6744
3D7_3_E6	9.77e-10	86.2791
3D7_3_E6	4.88e-10	88.1395
3D7_3_E6	2.44e-10	90
3D7_3_E6	1.22e-10	94.8837
3D7_3_E6	6.1e-11	88.1395
3D7_3_E6	3.05e-11	89.5349
3D7_3_E6	1.53e-11	95.5814
3D7	5e-07	9.64975
3D7	2.5e-07	7.50536
3D7	1.25e-07	7.3624
3D7	6.25e-08	8.0772
3D7	3.13e-08	8.93495
3D7	1.56e-08	8.22016
3D7	7.81e-09	8.22016
3D7	3.91e-09	42.6733
3D7	1.95e-09	40.8149
3D7	9.77e-10	67.8342
3D7	4.88e-10	78.2702
3D7	2.44e-10	88.8492
3D7	1.22e-10	97.9986
3D7	6.1e-11	93.138
3D7	3.05e-11	94.9964
3D7	1.53e-11	93.7098
3D7	5e-07	8.90973
3D7	2.5e-07	6.79953
3D7	1.25e-07	6.21336
3D7	6.25e-08	6.56506
3D7	3.13e-08	6.6823
3D7	1.56e-08	6.44783
3D7	7.81e-09	7.3857
3D7	3.91e-09	11.8406
3D7	1.95e-09	32.0047
3D7	9.77e-10	60.9613
3D7	4.88e-10	82.0633
3D7	2.44e-10	90.973
3D7	1.22e-10	93.5522
3D7	6.1e-11	91.3247
3D7	3.05e-11	94.8417
3D7	1.53e-11	91.3247
3D7	5e-07	17.0347
3D7	2.5e-07	15.142
3D7	1.25e-07	20.0315
3D7	6.25e-08	14.1956
3D7	3.13e-08	14.3533
3D7	1.56e-08	14.511
3D7	7.81e-09	14.6688
3D7	3.91e-09	17.3502
3D7	1.95e-09	26.9716
3D7	9.77e-10	37.3817
3D7	4.88e-10	70.347
3D7	2.44e-10	85.1735
3D7	1.22e-10	96.53
3D7	6.1e-11	98.1073
3D7	3.05e-11	94.3218
3D7	1.53e-11	97.6341
Dd2	5e-07	8.91089
Dd2	2.5e-07	9.75098
Dd2	1.25e-07	10.351
Dd2	6.25e-08	11.3711
Dd2	3.13e-08	12.0312
Dd2	1.56e-08	12.8113
Dd2	7.81e-09	18.9319
Dd2	3.91e-09	41.7342
Dd2	1.95e-09	56.3756
Dd2	9.77e-10	77.9178
Dd2	4.88e-10	86.1386
Dd2	2.44e-10	89.1989
Dd2	1.22e-10	93.0993
Dd2	6.1e-11	93.1593
Dd2	3.05e-11	92.7993
Dd2	1.53e-11	95.0195
Dd2	5e-07	9.28302
Dd2	2.5e-07	11.3962
Dd2	1.25e-07	13.8113
Dd2	6.25e-08	15.1698
Dd2	3.13e-08	15.3208
Dd2	1.56e-08	15.6226
Dd2	7.81e-09	24.8302
Dd2	3.91e-09	32.8302
Dd2	1.95e-09	42.0377
Dd2	9.77e-10	52.4528
Dd2	4.88e-10	61.5094
Dd2	2.44e-10	72.0755
Dd2	1.22e-10	71.4717
Dd2	6.1e-11	80.9811
Dd2	3.05e-11	73.434
Dd2	1.53e-11	76.7547
Dd2	5e-07	22.5806
Dd2	2.5e-07	22.1896
Dd2	1.25e-07	21.9941
Dd2	6.25e-08	20.6256
Dd2	3.13e-08	25.3177
Dd2	1.56e-08	28.6413
Dd2	7.81e-09	30.9873
Dd2	3.91e-09	46.4321
Dd2	1.95e-09	60.1173
Dd2	9.77e-10	69.1105
Dd2	4.88e-10	86.5103
Dd2	2.44e-10	95.6989
Dd2	1.22e-10	92.9619
Dd2	6.1e-11	93.3529
Dd2	3.05e-11	96.4809
Dd2	1.53e-11	92.3754
Dd2_1_F3	5e-07	8.02377
Dd2_1_F3	2.5e-07	9.95542
Dd2_1_F3	1.25e-07	10.4012
Dd2_1_F3	6.25e-08	9.95542
Dd2_1_F3	3.13e-08	15.0074
Dd2_1_F3	1.56e-08	30.312
Dd2_1_F3	7.81e-09	66.5676
Dd2_1_F3	3.91e-09	88.7073
Dd2_1_F3	1.95e-09	97.3254
Dd2_1_F3	9.77e-10	96.2853
Dd2_1_F3	4.88e-10	96.2853
Dd2_1_F3	2.44e-10	100.149
Dd2_1_F3	1.22e-10	97.7712
Dd2_1_F3	6.1e-11	95.6909
Dd2_1_F3	3.05e-11	100.149
Dd2_1_F3	1.53e-11	95.9881
Dd2_1_F3	5e-07	21.2925
Dd2_1_F3	2.5e-07	21.2925
Dd2_1_F3	1.25e-07	23.6123
Dd2_1_F3	6.25e-08	23.6123
Dd2_1_F3	3.13e-08	37.034
Dd2_1_F3	1.56e-08	48.3016
Dd2_1_F3	7.81e-09	73.6537
Dd2_1_F3	3.91e-09	86.744
Dd2_1_F3	1.95e-09	102.651
Dd2_1_F3	9.77e-10	103.645
Dd2_1_F3	4.88e-10	102.983
Dd2_1_F3	2.44e-10	106.959
Dd2_1_F3	1.22e-10	105.468
Dd2_1_F3	6.1e-11	105.8
Dd2_1_F3	3.05e-11	106.462
Dd2_1_F3	1.53e-11	98.343
Dd2_1_F3	5e-07	35.6869
Dd2_1_F3	2.5e-07	21.4121
Dd2_1_F3	1.25e-07	23.4075
Dd2_1_F3	6.25e-08	25.0959
Dd2_1_F3	3.13e-08	34.6124
Dd2_1_F3	1.56e-08	64.2364
Dd2_1_F3	7.81e-09	72.218
Dd2_1_F3	3.91e-09	78.8181
Dd2_1_F3	1.95e-09	88.7951
Dd2_1_F3	9.77e-10	92.4789
Dd2_1_F3	4.88e-10	96.0092
Dd2_1_F3	2.44e-10	96.1627
Dd2_1_F3	1.22e-10	99.5395
Dd2_1_F3	6.1e-11	99.5395
Dd2_1_F3	3.05e-11	95.2417
Dd2_1_F3	1.53e-11	94.1673
Dd2	5e-07	12.3867
Dd2	2.5e-07	11.2991
Dd2	1.25e-07	10.4532
Dd2	6.25e-08	9.7281
Dd2	3.13e-08	11.6616
Dd2	1.56e-08	12.9909
Dd2	7.81e-09	14.9245
Dd2	3.91e-09	42.1148
Dd2	1.95e-09	58.1873
Dd2	9.77e-10	74.139
Dd2	4.88e-10	84.4109
Dd2	2.44e-10	91.5408
Dd2	1.22e-10	94.6828
Dd2	6.1e-11	93.716
Dd2	3.05e-11	98.5498
Dd2	1.53e-11	100.363
Dd2	5e-07	12.3867
Dd2	2.5e-07	11.2991
Dd2	1.25e-07	10.4532
Dd2	6.25e-08	9.7281
Dd2	3.13e-08	11.6616
Dd2	1.56e-08	12.9909
Dd2	7.81e-09	14.9245
Dd2	3.91e-09	42.1148
Dd2	1.95e-09	58.1873
Dd2	9.77e-10	74.139
Dd2	4.88e-10	84.4109
Dd2	2.44e-10	91.5408
Dd2	1.22e-10	94.6828
Dd2	6.1e-11	93.716
Dd2	3.05e-11	98.5498
Dd2	1.53e-11	100.363
Dd2	5e-07	9.40265
Dd2	2.5e-07	7.85398
Dd2	1.25e-07	7.52212
Dd2	6.25e-08	10.6195
Dd2	3.13e-08	7.74336
Dd2	1.56e-08	10.177
Dd2	7.81e-09	16.8142
Dd2	3.91e-09	36.0619
Dd2	1.95e-09	58.7389
Dd2	9.77e-10	78.208
Dd2	4.88e-10	87.9425
Dd2	2.44e-10	92.3673
Dd2	1.22e-10	91.8142
Dd2	6.1e-11	92.146
Dd2	3.05e-11	96.5708
Dd2	1.53e-11	99.6681
Dd2_4_G5	5e-07	15.0888
Dd2_4_G5	2.5e-07	16.8639
Dd2_4_G5	1.25e-07	20.5621
Dd2_4_G5	6.25e-08	26.9231
Dd2_4_G5	3.13e-08	43.0473
Dd2_4_G5	1.56e-08	77.071
Dd2_4_G5	7.81e-09	83.1361
Dd2_4_G5	3.91e-09	87.8698
Dd2_4_G5	1.95e-09	100.888
Dd2_4_G5	9.77e-10	99.2604
Dd2_4_G5	4.88e-10	100.148
Dd2_4_G5	2.44e-10	104.142
Dd2_4_G5	1.22e-10	103.107
Dd2_4_G5	6.1e-11	105.325
Dd2_4_G5	3.05e-11	106.065
Dd2_4_G5	1.53e-11	104.438
Dd2_4_G5	5e-07	10.8758
Dd2_4_G5	2.5e-07	16.1694
Dd2_4_G5	1.25e-07	15.3032
Dd2_4_G5	6.25e-08	26.0828
Dd2_4_G5	3.13e-08	46.487
Dd2_4_G5	1.56e-08	75.4572
Dd2_4_G5	7.81e-09	83.6381
Dd2_4_G5	3.91e-09	90.4716
Dd2_4_G5	1.95e-09	93.0703
Dd2_4_G5	9.77e-10	90.3754
Dd2_4_G5	4.88e-10	88.7392
Dd2_4_G5	2.44e-10	90.0866
Dd2_4_G5	1.22e-10	94.2252
Dd2_4_G5	6.1e-11	88.4504
Dd2_4_G5	3.05e-11	90.2791
Dd2_4_G5	1.53e-11	98.5563
Dd2_4_G5	5e-07	14.4237
Dd2_4_G5	2.5e-07	19.6138
Dd2_4_G5	1.25e-07	23.4762
Dd2_4_G5	6.25e-08	27.4593
Dd2_4_G5	3.13e-08	52.6856
Dd2_4_G5	1.56e-08	74.1702
Dd2_4_G5	7.81e-09	94.2064
Dd2_4_G5	3.91e-09	95.5341
Dd2_4_G5	1.95e-09	102.776
Dd2_4_G5	9.77e-10	93.6029
Dd2_4_G5	4.88e-10	96.9825
Dd2_4_G5	2.44e-10	95.5341
Dd2_4_G5	1.22e-10	93.4822
Dd2_4_G5	6.1e-11	94.5685
Dd2_4_G5	3.05e-11	93.6029
Dd2_4_G5	1.53e-11	95.7755
Dd2	5e-07	32.4744
Dd2	2.5e-07	28.6422
Dd2	1.25e-07	30.0297
Dd2	6.25e-08	29.4351
Dd2	3.13e-08	31.7476
Dd2	1.56e-08	33.3333
Dd2	7.81e-09	32.7387
Dd2	3.91e-09	39.5441
Dd2	1.95e-09	51.371
Dd2	9.77e-10	56.1282
Dd2	4.88e-10	77.6677
Dd2	2.44e-10	94.3839
Dd2	1.22e-10	107.334
Dd2	6.1e-11	124.315
Dd2	3.05e-11	108.986
Dd2	1.53e-11	112.686
Dd2	5e-07	18.0705
Dd2	2.5e-07	17.8205
Dd2	1.25e-07	17.6206
Dd2	6.25e-08	17.3707
Dd2	3.13e-08	17.5206
Dd2	1.56e-08	18.1705
Dd2	7.81e-09	22.5194
Dd2	3.91e-09	43.7141
Dd2	1.95e-09	52.112
Dd2	9.77e-10	68.5079
Dd2	4.88e-10	86.1535
Dd2	2.44e-10	91.802
Dd2	1.22e-10	95.851
Dd2	6.1e-11	94.1515
Dd2	3.05e-11	95.2012
Dd2	1.53e-11	105.999
Dd2	5e-07	19.5652
Dd2	2.5e-07	19.3423
Dd2	1.25e-07	18.8406
Dd2	6.25e-08	18.8406
Dd2	3.13e-08	18.2832
Dd2	1.56e-08	18.6176
Dd2	7.81e-09	20.5128
Dd2	3.91e-09	37.4025
Dd2	1.95e-09	58.0825
Dd2	9.77e-10	79.5987
Dd2	4.88e-10	95.0948
Dd2	2.44e-10	104.738
Dd2	1.22e-10	107.469
Dd2	6.1e-11	105.853
Dd2	3.05e-11	109.755
Dd2	1.53e-11	111.037

## Sheet: S2_Data
Parasite	Concentration	% Proliferation of control
3D7	2e-07	4.21639
3D7	1e-07	0.0795545
3D7	5e-08	1.19332
3D7	2.5e-08	2.94352
3D7	1.25e-08	10.1034
3D7	6.25e-09	32.0605
3D7	3.13e-09	33.3333
3D7	1.56e-09	53.3811
3D7	7.81e-10	75.4972
3D7	3.91e-10	81.8616
3D7	1.95e-10	94.7494
3D7	9.77e-11	95.5449
3D7	4.88e-11	96.8178
3D7	2.44e-11	94.5903
3D7	1.22e-11	102.705
3D7	6.1e-12	95.0676
3D7	2e-07	29.4416
3D7	1e-07	30.0943
3D7	5e-08	30.7469
3D7	2.5e-08	28.5714
3D7	1.25e-08	30.5294
3D7	6.25e-09	33.285
3D7	3.13e-09	45.4677
3D7	1.56e-09	64.8296
3D7	7.81e-10	76.6497
3D7	3.91e-10	82.8136
3D7	1.95e-10	89.05
3D7	9.77e-11	97.607
3D7	4.88e-11	101.233
3D7	2.44e-11	100.218
3D7	1.22e-11	102.683
3D7	6.1e-12	103.988
3D7	2e-07	11.2416
3D7	1e-07	9.0604
3D7	5e-08	8.22148
3D7	2.5e-08	8.05369
3D7	1.25e-08	9.0604
3D7	6.25e-09	13.0872
3D7	3.13e-09	24.1611
3D7	1.56e-09	49.6644
3D7	7.81e-10	56.5436
3D7	3.91e-10	67.953
3D7	1.95e-10	83.2215
3D7	9.77e-11	90.7718
3D7	4.88e-11	94.7987
3D7	2.44e-11	95.4698
3D7	1.22e-11	96.9799
3D7	6.1e-12	107.886
3D7_1_G5	2e-07	5.9216
3D7_1_G5	1e-07	-5.08757
3D7_1_G5	5e-08	-0.250209
3D7_1_G5	2.5e-08	7.75646
3D7_1_G5	1.25e-08	2.58549
3D7_1_G5	6.25e-09	0.58382
3D7_1_G5	3.13e-09	7.75646
3D7_1_G5	1.56e-09	30.9425
3D7_1_G5	7.81e-10	65.4712
3D7_1_G5	3.91e-10	60.1334
3D7_1_G5	1.95e-10	76.814
3D7_1_G5	9.77e-11	92.9942
3D7_1_G5	4.88e-11	93.6614
3D7_1_G5	2.44e-11	96.6639
3D7_1_G5	1.22e-11	97.4979
3D7_1_G5	6.1e-12	99.3328
3D7_1_G5	2e-07	31.2983
3D7_1_G5	1e-07	32.9985
3D7_1_G5	5e-08	42.5039
3D7_1_G5	2.5e-08	30.4482
3D7_1_G5	1.25e-08	34.7759
3D7_1_G5	6.25e-09	32.3802
3D7_1_G5	3.13e-09	37.558
3D7_1_G5	1.56e-09	48.6862
3D7_1_G5	7.81e-10	59.8145
3D7_1_G5	3.91e-10	68.8563
3D7_1_G5	1.95e-10	80.5255
3D7_1_G5	9.77e-11	87.6352
3D7_1_G5	4.88e-11	94.204
3D7_1_G5	2.44e-11	97.2952
3D7_1_G5	1.22e-11	98.9954
3D7_1_G5	6.1e-12	105.178
3D7_1_G5	2e-07	11.4327
3D7_1_G5	1e-07	10.275
3D7_1_G5	5e-08	10.1302
3D7_1_G5	2.5e-08	9.11722
3D7_1_G5	1.25e-08	9.98553
3D7_1_G5	6.25e-09	13.0246
3D7_1_G5	3.13e-09	16.2084
3D7_1_G5	1.56e-09	28.22
3D7_1_G5	7.81e-10	46.7438
3D7_1_G5	3.91e-10	52.2431
3D7_1_G5	1.95e-10	69.4645
3D7_1_G5	9.77e-11	76.7004
3D7_1_G5	4.88e-11	83.7916
3D7_1_G5	2.44e-11	85.5282
3D7_1_G5	1.22e-11	85.6729
3D7_1_G5	6.1e-12	88.4226
3D7_2_B6	2e-07	17.6829
3D7_2_B6	1e-07	11.5854
3D7_2_B6	5e-08	18.9024
3D7_2_B6	2.5e-08	12.6016
3D7_2_B6	1.25e-08	16.0569
3D7_2_B6	6.25e-09	14.6341
3D7_2_B6	3.13e-09	35.7724
3D7_2_B6	1.56e-09	61.5854
3D7_2_B6	7.81e-10	66.6667
3D7_2_B6	3.91e-10	71.748
3D7_2_B6	1.95e-10	83.1301
3D7_2_B6	9.77e-11	92.6829
3D7_2_B6	4.88e-11	95.935
3D7_2_B6	2.44e-11	94.7154
3D7_2_B6	1.22e-11	107.927
3D7_2_B6	6.1e-12	114.228
3D7_2_B6	2e-07	14.5315
3D7_2_B6	1e-07	13.7667
3D7_2_B6	5e-08	15.4876
3D7_2_B6	2.5e-08	13.5755
3D7_2_B6	1.25e-08	15.1052
3D7_2_B6	6.25e-09	18.3556
3D7_2_B6	3.13e-09	30.0191
3D7_2_B6	1.56e-09	48.1836
3D7_2_B6	7.81e-10	59.6558
3D7_2_B6	3.91e-10	65.9656
3D7_2_B6	1.95e-10	80.1147
3D7_2_B6	9.77e-11	85.086
3D7_2_B6	4.88e-11	89.4837
3D7_2_B6	2.44e-11	88.5277
3D7_2_B6	1.22e-11	93.6902
3D7_2_B6	6.1e-12	99.4264
3D7_2_B6	2e-07	19.4271
3D7_2_B6	1e-07	17.4346
3D7_2_B6	5e-08	17.4346
3D7_2_B6	2.5e-08	16.812
3D7_2_B6	1.25e-08	19.3026
3D7_2_B6	6.25e-09	21.7933
3D7_2_B6	3.13e-09	34.122
3D7_2_B6	1.56e-09	53.4247
3D7_2_B6	7.81e-10	66.7497
3D7_2_B6	3.91e-10	72.2291
3D7_2_B6	1.95e-10	79.9502
3D7_2_B6	9.77e-11	88.792
3D7_2_B6	4.88e-11	90.9091
3D7_2_B6	2.44e-11	94.0224
3D7_2_B6	1.22e-11	94.1469
3D7_2_B6	6.1e-12	99.3773
3D7_3_E6	2e-07	-6.62359
3D7_3_E6	1e-07	-3.71567
3D7_3_E6	5e-08	18.9015
3D7_3_E6	2.5e-08	34.0872
3D7_3_E6	1.25e-08	56.3813
3D7_3_E6	6.25e-09	78.0291
3D7_3_E6	3.13e-09	88.0452
3D7_3_E6	1.56e-09	98.3845
3D7_3_E6	7.81e-10	105.816
3D7_3_E6	3.91e-10	90.3069
3D7_3_E6	1.95e-10	86.7528
3D7_3_E6	9.77e-11	93.538
3D7_3_E6	4.88e-11	100.969
3D7_3_E6	2.44e-11	103.877
3D7_3_E6	1.22e-11	107.108
3D7_3_E6	6.1e-12	98.3845
3D7_3_E6	2e-07	20.4828
3D7_3_E6	1e-07	19.931
3D7_3_E6	5e-08	26.8276
3D7_3_E6	2.5e-08	35.0345
3D7_3_E6	1.25e-08	54.6897
3D7_3_E6	6.25e-09	56.7586
3D7_3_E6	3.13e-09	65.7931
3D7_3_E6	1.56e-09	79.3793
3D7_3_E6	7.81e-10	77.931
3D7_3_E6	3.91e-10	75.7931
3D7_3_E6	1.95e-10	77.5862
3D7_3_E6	9.77e-11	80.8276
3D7_3_E6	4.88e-11	77.4483
3D7_3_E6	2.44e-11	80
3D7_3_E6	1.22e-11	81.7931
3D7_3_E6	6.1e-12	86.6897
3D7_3_E6	2e-07	19.4656
3D7_3_E6	1e-07	12.9771
3D7_3_E6	5e-08	25.9542
3D7_3_E6	2.5e-08	38.1679
3D7_3_E6	1.25e-08	54.5802
3D7_3_E6	6.25e-09	65.2672
3D7_3_E6	3.13e-09	76.3359
3D7_3_E6	1.56e-09	90.8397
3D7_3_E6	7.81e-10	84.7328
3D7_3_E6	3.91e-10	81.2977
3D7_3_E6	1.95e-10	84.3511
3D7_3_E6	9.77e-11	88.1679
3D7_3_E6	4.88e-11	89.6947
3D7_3_E6	2.44e-11	91.6031
3D7_3_E6	1.22e-11	93.8931
3D7_3_E6	6.1e-12	102.29
Dd2	2e-07	9.31264
Dd2	1e-07	10.1996
Dd2	5e-08	6.87361
Dd2	2.5e-08	8.86918
Dd2	1.25e-08	13.5255
Dd2	6.25e-09	13.082
Dd2	3.13e-09	29.7118
Dd2	1.56e-09	43.9024
Dd2	7.81e-10	67.8492
Dd2	3.91e-10	74.2794
Dd2	1.95e-10	81.153
Dd2	9.77e-11	82.9268
Dd2	4.88e-11	86.6962
Dd2	2.44e-11	86.2528
Dd2	1.22e-11	87.1397
Dd2	6.1e-12	98.6696
Dd2	2e-07	23.2309
Dd2	1e-07	22.945
Dd2	5e-08	28.9492
Dd2	2.5e-08	27.3767
Dd2	1.25e-08	35.8113
Dd2	6.25e-09	36.3831
Dd2	3.13e-09	36.812
Dd2	1.56e-09	46.5332
Dd2	7.81e-10	68.9778
Dd2	3.91e-10	83.1308
Dd2	1.95e-10	92.2802
Dd2	9.77e-11	97.5697
Dd2	4.88e-11	97.2838
Dd2	2.44e-11	98.9993
Dd2	1.22e-11	95.9971
Dd2	6.1e-12	94.7105
Dd2	2e-07	27.6501
Dd2	1e-07	26.464
Dd2	5e-08	29.874
Dd2	2.5e-08	26.6123
Dd2	1.25e-08	28.8362
Dd2	6.25e-09	34.1735
Dd2	3.13e-09	39.5107
Dd2	1.56e-09	49.8888
Dd2	7.81e-10	72.5723
Dd2	3.91e-10	82.5056
Dd2	1.95e-10	97.7761
Dd2	9.77e-11	104.151
Dd2	4.88e-11	103.41
Dd2	2.44e-11	96.8866
Dd2	1.22e-11	97.7761
Dd2	6.1e-12	98.0726
Dd2_1_F3	2e-07	47.2406
Dd2_1_F3	1e-07	48.1236
Dd2_1_F3	5e-08	60.2649
Dd2_1_F3	2.5e-08	89.1832
Dd2_1_F3	1.25e-08	82.1192
Dd2_1_F3	6.25e-09	84.7682
Dd2_1_F3	3.13e-09	97.351
Dd2_1_F3	1.56e-09	96.2472
Dd2_1_F3	7.81e-10	101.766
Dd2_1_F3	3.91e-10	95.3642
Dd2_1_F3	1.95e-10	95.8057
Dd2_1_F3	9.77e-11	112.141
Dd2_1_F3	4.88e-11	96.0265
Dd2_1_F3	2.44e-11	98.6755
Dd2_1_F3	1.22e-11	95.1435
Dd2_1_F3	6.1e-12	90.0662
Dd2_1_F3	2e-07	30.443
Dd2_1_F3	1e-07	38.1715
Dd2_1_F3	5e-08	64.9387
Dd2_1_F3	2.5e-08	75.3063
Dd2_1_F3	1.25e-08	89.0669
Dd2_1_F3	6.25e-09	89.4439
Dd2_1_F3	3.13e-09	94.722
Dd2_1_F3	1.56e-09	89.2554
Dd2_1_F3	7.81e-10	91.3289
Dd2_1_F3	3.91e-10	95.099
Dd2_1_F3	1.95e-10	93.0254
Dd2_1_F3	9.77e-11	101.32
Dd2_1_F3	4.88e-11	99.623
Dd2_1_F3	2.44e-11	96.607
Dd2_1_F3	1.22e-11	91.8944
Dd2_1_F3	6.1e-12	92.0829
Dd2_1_F3	2e-07	35.6812
Dd2_1_F3	1e-07	41.9833
Dd2_1_F3	5e-08	56.4411
Dd2_1_F3	2.5e-08	74.05
Dd2_1_F3	1.25e-08	85.1715
Dd2_1_F3	6.25e-09	87.025
Dd2_1_F3	3.13e-09	86.6543
Dd2_1_F3	1.56e-09	84.2447
Dd2_1_F3	7.81e-10	95.3661
Dd2_1_F3	3.91e-10	92.0297
Dd2_1_F3	1.95e-10	91.8443
Dd2_1_F3	9.77e-11	99.0732
Dd2_1_F3	4.88e-11	102.224
Dd2_1_F3	2.44e-11	87.5811
Dd2_1_F3	1.22e-11	88.5079
Dd2_1_F3	6.1e-12	75.1622
Dd2_4_G5	2e-07	23.8938
Dd2_4_G5	1e-07	29.4002
Dd2_4_G5	5e-08	25.4671
Dd2_4_G5	2.5e-08	41.0029
Dd2_4_G5	1.25e-08	23.8938
Dd2_4_G5	6.25e-09	29.9902
Dd2_4_G5	3.13e-09	40.0197
Dd2_4_G5	1.56e-09	50.0492
Dd2_4_G5	7.81e-10	67.5516
Dd2_4_G5	3.91e-10	72.6647
Dd2_4_G5	1.95e-10	73.8446
Dd2_4_G5	9.77e-11	82.1042
Dd2_4_G5	4.88e-11	78.3677
Dd2_4_G5	2.44e-11	73.8446
Dd2_4_G5	1.22e-11	77.5811
Dd2_4_G5	6.1e-12	97.0501
Dd2_4_G5	2e-07	27.8882
Dd2_4_G5	1e-07	32.4503
Dd2_4_G5	5e-08	27.8882
Dd2_4_G5	2.5e-08	30.8315
Dd2_4_G5	1.25e-08	33.039
Dd2_4_G5	6.25e-09	40.6917
Dd2_4_G5	3.13e-09	41.2804
Dd2_4_G5	1.56e-09	53.4952
Dd2_4_G5	7.81e-10	81.0155
Dd2_4_G5	3.91e-10	91.0228
Dd2_4_G5	1.95e-10	98.8227
Dd2_4_G5	9.77e-11	98.9698
Dd2_4_G5	4.88e-11	105.887
Dd2_4_G5	2.44e-11	99.5585
Dd2_4_G5	1.22e-11	101.325
Dd2_4_G5	6.1e-12	101.619
Dd2_4_G5	2e-07	30.6263
Dd2_4_G5	1e-07	28.424
Dd2_4_G5	5e-08	28.5616
Dd2_4_G5	2.5e-08	31.7275
Dd2_4_G5	1.25e-08	33.3792
Dd2_4_G5	6.25e-09	31.8651
Dd2_4_G5	3.13e-09	41.638
Dd2_4_G5	1.56e-09	63.2485
Dd2_4_G5	7.81e-10	74.2602
Dd2_4_G5	3.91e-10	81.4178
Dd2_4_G5	1.95e-10	90.9153
Dd2_4_G5	9.77e-11	93.6683
Dd2_4_G5	4.88e-11	95.32
Dd2_4_G5	2.44e-11	102.065
Dd2_4_G5	1.22e-11	97.7977
Dd2_4_G5	6.1e-12	96.5588

## Sheet: S3_Data
Compound	Concentration	% Proliferation of control
9M-P	1e-07	2.7597
9M-P	5e-08	14.1022
9M-P	2.5e-08	24.487
9M-P	1.25e-08	34.9126
9M-P	6.25e-09	67.5732
9M-P	3.13e-09	78.5307
9M-P	1.56e-09	87.2601
9M-P	7.81e-10	99.209
9M-P	3.91e-10	95.9215
9M-P	1e-07	3.57959
9M-P	5e-08	13.1548
9M-P	2.5e-08	27.7873
9M-P	1.25e-08	42.6411
9M-P	6.25e-09	66.879
9M-P	3.13e-09	78.4337
9M-P	1.56e-09	87.2348
9M-P	7.81e-10	95.4259
9M-P	3.91e-10	96.176
9M-P	1e-07	4.70459
9M-P	5e-08	11.4727
9M-P	2.5e-08	24.3463
9M-P	1.25e-08	36.223
9M-P	6.25e-09	65.2447
9M-P	3.13e-09	84.0269
9M-P	1.56e-09	93.8169
9M-P	7.81e-10	88.5766
9M-P	3.91e-10	97.5087
9MG	1e-07	1.32954
9MG	5e-08	1.27539
9MG	2.5e-08	4.8324
9MG	1.25e-08	10.7713
9MG	6.25e-09	21.6466
9MG	3.13e-09	52.5901
9MG	1.56e-09	76.7757
9MG	7.81e-10	94.6444
9MG	3.91e-10	96.1527
9MG	1e-07	1.15486
9MG	5e-08	1.13981
9MG	2.5e-08	6.04242
9MG	1.25e-08	14.3313
9MG	6.25e-09	20.0317
9MG	3.13e-09	53.0986
9MG	1.56e-09	81.5053
9MG	7.81e-10	93.3261
9MG	3.91e-10	90.8792
9MG	1e-07	0.951325
9MG	5e-08	1.2073
9MG	2.5e-08	6.01893
9MG	1.25e-08	14.349
9MG	6.25e-09	20.6685
9MG	3.13e-09	56.626
9MG	1.56e-09	84.6682
9MG	7.81e-10	93.6697
9MG	3.91e-10	93.903

## Sheet: S4_Data
Accession	Log2-Re	Log2-Rc	SigRe	SigRc	count_Significant	Product Description	GeneSymbol	Molecular Weight
PF3D7_0622600	6.64386	2.66484	1	1	2	cytochrome b-c1 complex subunit 9, putative	QCR9	11696
PF3D7_1435000	6.64386	1.16878	1	1	2	cytochrome c oxidase assembly protein COX15, putative	COX15	50425
PF3D7_1012300	6.64386	1.01633	1	1	2	cytochrome b-c1 complex subunit 7, putative	QCR7	23020
PF3D7_1409400	5.60186	4.42569	1	1	2	conserved protein, unknown function	N/A	30539
PF3D7_0417200	5.47939	4.40193	1	1	2	bifunctional dihydrofolate reductase-thymidylate synthase	DHFR-TS	71737
PF3D7_0312800	4.01429	3.43259	1	1	2	60S ribosomal protein L26, putative	N/A	14813
PF3D7_0822900	4.33434	3.39004	1	1	2	PhIL1-interacting candidate PIC2	PIC2	138242
PF3D7_1211400	6.64386	3.3081	1	1	2	heat shock protein DNAJ homologue Pfj4	PfJ4	28062
PF3D7_1223400	4.50844	3.29328	1	1	2	phospholipid-transporting ATPase, putative	N/A	190446
PF3D7_0608700	2.19204	2.94421	1	1	2	T-complex protein 1 subunit zeta	CCT6	61534
PF3D7_1206200	2.53734	2.90618	1	1	2	eukaryotic translation initiation factor 3 subunit C, putative	EIF3C	116014
PF3D7_0305500	4.42	2.89642	1	1	2	protein dopey homolog, putative	N/A	467882
PF3D7_0106300	2.74547	2.80166	1	1	2	calcium-transporting ATPase	ATP6	139415
PF3D7_1466300	2.32334	2.77109	1	1	2	26S proteasome regulatory subunit RPN2, putative	RPN2	132767
PF3D7_0618000	6.75884	2.71411	1	1	2	conserved Plasmodium membrane protein, unknown function	N/A	92755
PF3D7_0821000	4.47443	2.69863	1	1	2	conserved Plasmodium protein, unknown function	N/A	60543
PF3D7_1352500	4.90853	2.68531	1	1	2	thioredoxin-related protein, putative	N/A	23988
PF3D7_1108600	2.52636	2.67454	1	1	2	endoplasmic reticulum-resident calcium binding protein	ERC	39374
PF3D7_0405400	2.38284	2.50774	1	1	2	pre-mRNA-processing-splicing factor 8, putative	PRPF8	366398
PF3D7_1342600	2.29595	2.41418	1	1	2	myosin A	MyoA	92277
PF3D7_0512600	2.04412	2.41163	1	1	2	ras-related protein Rab-1B	RAB1b	22886
PF3D7_1447900	2.12688	2.34352	1	1	2	multidrug resistance protein 2	MDR2	119012
PF3D7_1410700	4.6932	2.33219	1	1	2	conserved protein, unknown function	N/A	39832
PF3D7_1016900	2.05543	2.32854	1	1	2	early transcribed membrane protein 10.3	ETRAMP10.3	11961
PF3D7_0306400	5.00093	2.31612	1	1	2	FAD-dependent glycerol-3-phosphate dehydrogenase, putative	N/A	74688
PF3D7_1353900	2.50121	2.30683	1	1	2	proteasome subunit alpha type-7, putative	N/A	27228
PF3D7_1353200	2.30033	2.27624	1	1	2	membrane associated histidine-rich protein 2	MAHRP2	15849
PF3D7_0523000	3.74463	2.26432	1	1	2	multidrug resistance protein 1	MDR1	162252
PF3D7_0720400	2.35638	2.24196	1	1	2	apoptosis-inducing factor, putative	AIF	72722
PF3D7_0824400	2.53187	2.20787	1	1	2	nucleoside transporter 2	NT2	67642
PF3D7_0922600	3.71358	2.13137	1	1	2	glutamine synthetase	N/A	63231
PF3D7_0702500	5.77765	2.07649	1	1	2	Plasmodium exported protein, unknown function	N/A	27673
PF3D7_0801800	2.67627	2.06493	1	1	2	mannose-6-phosphate isomerase, putative	N/A	117662
PF3D7_0919100	3.15046	2.06357	1	1	2	DnaJ protein, putative	N/A	43260
PF3D7_1142500	2.47084	2.02306	1	1	2	60S ribosomal protein L28	RPL28	14407
PF3D7_0312500	6.64386	2.0166	1	1	2	multidrug-resistant modulator MFR3	MFR3	67769
PF3D7_0914200	6.64386	1.96854	1	1	2	phospholipid or glycerol acyltransferase, putative	N/A	49339
PF3D7_0214000	2.8822	1.9627	1	1	2	T-complex protein 1 subunit theta	CCT8	60959
PF3D7_1306200	4.54733	1.92389	1	1	2	conserved protein, unknown function	N/A	56811
PF3D7_1413900	6.64386	1.92044	1	1	2	DnaJ protein, putative	N/A	45239
PF3D7_1361800	3.267	1.912	1	1	2	glideosome-associated connector	GAC	291023
PF3D7_1419200	5.46598	1.90603	1	1	2	thioredoxin-like protein, putative	ATrx1	80239
PF3D7_1457000	4.62224	1.89994	1	1	2	signal peptide peptidase	SPP	47579
PF3D7_0727800	4.39566	1.87748	1	1	2	cation transporting ATPase, putative	N/A	225077
PF3D7_1450100	3.43898	1.87239	1	1	2	signal recognition particle subunit SRP54	SRP54	55979
PF3D7_1338300	4.60977	1.86562	1	1	2	elongation factor 1-gamma, putative	EF-1gamma	47777
PF3D7_0904900	2.54413	1.85371	1	1	2	copper-transporting ATPase	CuTP	299390
PF3D7_0915400	3.87342	1.84521	1	1	2	ATP-dependent 6-phosphofructokinase	PFK9	159452
PF3D7_0831700	2.51852	1.83648	1	1	2	heat shock protein 70	HSP70x	75053
PF3D7_0501000	2.12383	1.81254	1	1	2	Plasmodium exported protein, unknown function	N/A	30716
PF3D7_1416100	2.82048	1.80564	1	1	2	protein SEY1, putative	SEY1	110610
PF3D7_0527500	2.01576	1.78689	1	1	2	Hsc70-interacting protein	HIP	51126
PF3D7_1438100	3.19707	1.7833	1	1	2	translocation protein SEC62, putative	SEC62	43937
PF3D7_1029600	2.51588	1.72225	1	1	2	adenosine deaminase	ADA	42466
PF3D7_1129000	4.40806	1.70894	1	1	2	spermidine synthase	SPDS	36596
PF3D7_1351400	2.52001	1.70683	1	1	2	60S ribosomal protein L17, putative	N/A	23415
PF3D7_1423700	2.15761	1.70248	1	1	2	NTF2-like domain-containing protein, putative	N/A	183575
PF3D7_0302900	4.21222	1.68247	1	1	2	exportin-1, putative	N/A	147938
PF3D7_1344800	3.83396	1.61589	1	1	2	aspartate carbamoyltransferase	ATCase	43252
PF3D7_1442300	6.64386	1.61286	1	1	2	tRNA import protein tRIP	tRIP	46441
PF3D7_0616800	3.68633	1.58392	1	1	2	malate:quinone oxidoreductase	MQO	59507
PF3D7_1021400	4.12603	1.56155	1	1	2	endomembrane protein 70, putative	N/A	72534
PF3D7_0604500	2.35469	1.55489	1	1	2	GYF domain-containing protein, putative	N/A	334410
PF3D7_0515700	3.41376	1.55135	1	1	2	glideosome-associated protein 40	GAP40	51800
PF3D7_1331300	3.07946	1.51049	1	1	2	signal peptidase complex catalytic subunit SEC11	SEC11	21125
PF3D7_0612100	2.36085	1.47011	1	1	2	eukaryotic translation initiation factor 3 subunit L, putative	EIF3L	78129
PF3D7_1235600	2.22354	1.45776	1	1	2	serine hydroxymethyltransferase	SHMT	49780
PF3D7_1362700	2.44695	1.45231	1	1	2	conserved Plasmodium protein, unknown function	N/A	242240
PF3D7_0709700	2.39187	1.44934	1	1	2	prodrug activation and resistance esterase	PARE	42358
PF3D7_0532300	2.48281	1.44092	1	1	2	Plasmodium exported protein (PHISTb), unknown function	N/A	60188
PF3D7_1456800	2.04769	1.43712	1	1	2	V-type H(+)-translocating pyrophosphatase, putative	VP1	76417
PF3D7_1116700	2.05735	1.40848	1	1	2	dipeptidyl aminopeptidase 1	DPAP1	80412
PF3D7_1405600	6.64386	1.39831	1	1	2	ribonucleoside-diphosphate reductase small chain, putative	RNR	40600
PF3D7_0811200	2.22267	1.37977	1	1	2	ER membrane protein complex subunit 1, putative	EMC1	133759
PF3D7_1204300	3.97612	1.3586	1	1	2	eukaryotic translation initiation factor 5A	EIF5A	17631
PF3D7_1117300	3.53123	1.34807	1	1	2	conserved protein, unknown function	N/A	15262
PF3D7_1008800	2.06266	1.33546	1	1	2	nucleolar protein 5, putative	NOP5	53410
PF3D7_0910400	3.32624	1.33004	1	1	2	selenide water dikinase, putative	N/A	140317
PF3D7_1216200	2.39708	1.32927	1	1	2	glycerol-3-phosphate dehydrogenase [NAD(+)], putative	N/A	41234
PF3D7_0524000	3.00222	1.3054	1	1	2	karyopherin beta	KASbeta	127353
PF3D7_1429800	2.20909	1.29091	1	1	2	coatomer subunit beta, putative	N/A	159972
PF3D7_1238800	4.00524	1.27618	1	1	2	acyl-CoA synthetase	ACS11	92092
PF3D7_1471200	4.80303	1.27171	1	1	2	inorganic anion exchanger, inorganic anion antiporter	SulP	75468
PF3D7_1223100	2.49527	1.26787	1	1	2	cAMP-dependent protein kinase regulatory subunit	PKAr	50833
PF3D7_0414300	5.41826	1.24784	1	1	2	Rab5-interacting protein, putative	N/A	13208
PF3D7_0405600	2.87685	1.24645	1	1	2	TMEM33 domain-containing protein, putative	N/A	37813
PF3D7_0932800	3.3612	1.23201	1	1	2	importin alpha re-exporter, putative	CSE1	159114
PF3D7_1461900	3.15564	1.22996	1	1	2	valine--tRNA ligase, putative	N/A	128071
PF3D7_0802000	2.65922	1.22701	1	1	2	glutamate dehydrogenase, putative	GDH3	160425
PF3D7_1014700	6.64386	1.2142	1	1	2	prohibitin 2	PHB2	34794
PF3D7_1242800	2.01189	1.20572	1	1	2	rab specific GDP dissociation inhibitor	rabGDI	52339
PF3D7_1468700	2.35697	1.20553	1	1	2	eukaryotic initiation factor 4A	eIF4A	45310
PF3D7_1105800	3.88338	1.19814	1	1	2	conserved Apicomplexan protein, unknown function	N/A	30661
PF3D7_1325100	2.10196	1.18831	1	1	2	phosphoribosylpyrophosphate synthetase	N/A	49383
PF3D7_1105700	2.34341	1.18078	1	1	2	tRNA-splicing ligase RtcB, putative	RTCB	56321
PF3D7_1412500	6.64386	1.17093	1	1	2	actin II	ACT2	42606
PF3D7_1212000	6.64386	1.16531	1	1	2	glutathione peroxidase-like thioredoxin peroxidase	TPx(Gl)	23953
PF3D7_1439800	2.24645	1.1648	1	1	2	vesicle-associated membrane protein, putative	N/A	27687
PF3D7_0204700	3.68144	1.15723	1	1	2	hexose transporter	HT1	56417
PF3D7_1323400	2.76789	1.13854	1	1	2	60S ribosomal protein L23	RPL23	22093
PF3D7_0424600	2.83139	1.13497	1	1	2	Plasmodium exported protein (PHISTb)	N/A	35962
PF3D7_0707400	3.22029	1.10845	1	1	2	ATPase family AAA domain-containing protein 3A, putative	ATAD3A	78187
PF3D7_0810600	2.05656	1.10565	1	1	2	ATP-dependent RNA helicase DBP1, putative	DBP1	108635
PF3D7_1357800	2.09706	1.09305	1	1	2	T-complex protein 1 subunit delta	CCT4	57978
PF3D7_1338100	2.33467	1.05723	1	1	2	26S proteasome regulatory subunit RPN3, putative	RPN3	59066
PF3D7_1230400	6.64386	1.03712	1	1	2	ATP-dependent protease subunit ClpQ	ClpQ	22871
PF3D7_0513600	3.18305	1.03268	1	1	2	deoxyribodipyrimidine photo-lyase, putative	N/A	129199
PF3D7_1021900	2.56591	1.02986	1	1	2	PHAX domain-containing protein, putative	N/A	267386
PF3D7_1201000	2.06807	1.02451	1	1	2	Plasmodium exported protein (PHISTb), unknown function	N/A	77116
PF3D7_1212700	2.14461	1.01993	1	1	2	eukaryotic translation initiation factor 3 subunit A, putative	EIF3A	166061
PF3D7_1004000	2.11157	1.0199	1	1	2	60S ribosomal protein L13, putative	N/A	23754
PF3D7_1012900	2.20428	1.01821	1	1	2	autophagy-related protein 18	ATG18	43520
PF3D7_1471100	2.69113	1.01675	1	1	2	exported protein 2	EXP2	33412
PF3D7_1354500	6.64386	1.01139	1	1	2	adenylosuccinate synthetase	ADSS	50065
PF3D7_1355100	0.57947	3.87906	0	1	1	DNA replication licensing factor MCM6	MCM6	105674
PF3D7_0812100	1.41677	3.49721	0	1	1	proteasome activator complex subunit 4, putative	N/A	314494
PF3D7_1328100	1.7802	3.38572	0	1	1	proteasome subunit beta type-7, putative	N/A	29962
PF3D7_1408100	0.822262	3.14563	0	1	1	plasmepsin III	PMIII	51693
PF3D7_1311500	1.29494	3.13875	0	1	1	26S protease regulatory subunit 7, putative	RPT1	46835
PF3D7_0423700	1.86154	2.98386	0	1	1	early transcribed membrane protein 4	ETRAMP4	14891
PF3D7_1353100	1.82419	2.84725	0	1	1	Plasmodium exported protein, unknown function	N/A	32784
PF3D7_1304500	1.66451	2.74623	0	1	1	small heat shock protein, putative	N/A	25195
PF3D7_1455300	0.607913	2.72506	0	1	1	conserved protein, unknown function	N/A	69527
PF3D7_1247400	1.02526	2.66888	0	1	1	peptidyl-prolyl cis-trans isomerase FKBP35	FKBP35	34827
PF3D7_1127600	1.15396	2.59635	0	1	1	CRAL/TRIO domain-containing protein, putative	N/A	34967
PF3D7_0914700	1.75308	2.53808	0	1	1	major facilitator superfamily-related transporter, putative	MFR4	58421
PF3D7_1118200	1.11849	2.26428	0	1	1	heat shock protein 90, putative	N/A	108465
PF3D7_1006800	1.42633	2.20531	0	1	1	G-strand-binding protein 2	GBP2	29530
PF3D7_0802200	1.32759	2.15178	0	1	1	1-cys peroxiredoxin	1-CysPxn	25164
PF3D7_0506900	1.50611	2.13948	0	1	1	rhomboid protease ROM4	ROM4	86654
PF3D7_0610900	1.16402	2.13762	0	1	1	transcription elongation factor SPT5, putative	SPT5	149366
PF3D7_0626700	1.20756	2.09671	0	1	1	ATPase	N/A	43650
PF3D7_0614300	1.73855	2.07276	0	1	1	major facilitator superfamily-related transporter, putative	MFR1	96980
PF3D7_0617200	0.560939	2.0167	0	1	1	BFR1 domain-containing protein, putative	N/A	52980
PF3D7_0904800	1.11351	1.98432	0	1	1	replication protein A1, small fragment	RPA1	56235
PF3D7_0305600	1.3164	1.9685	0	1	1	DNA-(apurinic or apyrimidinic site) endonuclease	APE1	72443
PF3D7_1244100	1.04951	1.94921	0	1	1	N-alpha-acetyltransferase 15, NatA auxiliary subunit, putative	N/A	154903
PF3D7_0622800	1.89623	1.94144	0	1	1	leucine--tRNA ligase, putative	N/A	170240
PF3D7_1132200	1.85078	1.93902	0	1	1	T-complex protein 1 subunit alpha	TCP1	60261
PF3D7_1331700	0.154545	1.84079	0	1	1	glutamine--tRNA ligase, putative	N/A	108532
PF3D7_1437000	1.44963	1.83073	0	1	1	N-acetyltransferase, GNAT family	NAT8	64188
PF3D7_1138500	1.82854	1.81927	0	1	1	protein phosphatase PPM2, protein phosphatase 2C	PPM2	105404
PF3D7_0106100	0.156227	1.75663	0	1	1	V-type proton ATPase subunit C, putative	N/A	45260
PF3D7_1235700	0.720142	1.75466	0	1	1	ATP synthase subunit beta, mitochondrial	N/A	58394
PF3D7_1104200	1.11418	1.75022	0	1	1	chromatin remodeling protein	SNF2L	167441
PF3D7_0213100	0.491293	1.74049	0	1	1	protein SIS1	SIS1	37356
PF3D7_1107300	0.480608	1.71124	0	1	1	polyadenylate-binding protein-interacting protein 1, putative	PAIP1	381872
PF3D7_0418200	1.02089	1.7054	0	1	1	eukaryotic translation initiation factor 3 subunit M, putative	EIF3M	51030
PF3D7_0910100	1.97316	1.69287	0	1	1	exportin-7, putative	N/A	139178
PF3D7_0629100	1.09116	1.69019	0	1	1	nicotinate phosphoribosyltransferase, putative	NAPRT	77126
PF3D7_0209800	1.90914	1.67749	0	1	1	ATP-dependent RNA helicase UAP56	UAP56	52224
PF3D7_1007700	1.04661	1.6738	0	1	1	AP2 domain transcription factor AP2-I	AP2-I	182665
PF3D7_0925900	1.57679	1.60253	0	1	1	lipocalin	LCN	24698
PF3D7_1369500	0.738851	1.59671	0	1	1	nuclear cap-binding protein subunit 1, putative	N/A	131374
PF3D7_1468100	-0.985596	1.59058	0	1	1	MORC family protein	MORC	295830
PF3D7_0812400	0.799787	1.55726	0	1	1	karyopherin alpha	KARalpha	61158
PF3D7_1364100	0.564558	1.54187	0	1	1	6-cysteine protein P92	P92	92728
PF3D7_0818200	0.934183	1.54135	0	1	1	14-3-3 protein	14-3-3I	30193
PF3D7_1137300	1.7526	1.48842	0	1	1	CLPTM1 domain-containing protein, putative	N/A	81607
PF3D7_1323100	-0.122543	1.48307	0	1	1	60S ribosomal protein L6, putative	N/A	21602
PF3D7_1407800	1.06175	1.43115	0	1	1	plasmepsin IV	PM4	51046
PF3D7_1225800	1.48856	1.42992	0	1	1	ubiquitin-activating enzyme E1	UBA1	131778
PF3D7_1246200	1.16963	1.42426	0	1	1	actin I	ACT1	41871
PF3D7_0207500	0.917865	1.40239	0	1	1	serine repeat antigen 6	SERA6	118836
PF3D7_1315500	0.958327	1.3836	0	1	1	conserved protein, unknown function	N/A	21464
PF3D7_0501300	0.857404	1.37075	0	1	1	skeleton-binding protein 1	SBP1	36299
PF3D7_1318800	1.76913	1.3703	0	1	1	translocation protein SEC63, putative	SEC63	75872
PF3D7_0108300	1.29108	1.33327	0	1	1	conserved Plasmodium protein, unknown function	ARP	254993
PF3D7_0423500	1.5322	1.31568	0	1	1	glideosome associated protein with multiple membrane spans 2	GAPM2	42618
PF3D7_1129900	0.777604	1.30487	0	1	1	major facilitator superfamily-related transporter, putative	MFR5	70139
PF3D7_1302100	1.25477	1.30044	0	1	1	gamete antigen 27/25	G27/25	26005
PF3D7_0624600	0.862101	1.29969	0	1	1	ISWI chromatin-remodeling complex ATPase	ISWI	315620
PF3D7_1237700	0.618883	1.27835	0	1	1	conserved protein, unknown function	N/A	23659
PF3D7_1343000	1.61616	1.27638	0	1	1	phosphoethanolamine N-methyltransferase	PMT	31043
PF3D7_1408000	0.944905	1.27409	0	1	1	plasmepsin II	PMII	51481
PF3D7_0703500	1.34598	1.27312	0	1	1	erythrocyte membrane-associated antigen	N/A	264916
PF3D7_1311900	0.210438	1.26799	0	1	1	V-type proton ATPase catalytic subunit A	vapA	68576
PF3D7_1113300	1.96563	1.25222	0	1	1	UDP-galactose transporter, putative	UGT	39425
PF3D7_0605100	1.74126	1.2498	0	1	1	KH domain-containing protein, putative	KH1	85631
PF3D7_1008900	1.09419	1.2356	0	1	1	adenylate kinase	AK1	27611
PF3D7_0920800	-0.355514	1.22204	0	1	1	inosine-5'-monophosphate dehydrogenase	IMPDH	56150
PF3D7_1145400	1.56186	1.21076	0	1	1	dynamin-like protein	DYN1	96374
PF3D7_0413900	1.25662	1.20726	0	1	1	ubiquitin carboxyl-terminal hydrolase 13, putative	USP13	98471
PF3D7_1421200	0.513871	1.202	0	1	1	40S ribosomal protein S25	RPS25	11664
PF3D7_0813400	-0.294228	1.18904	0	1	1	conserved protein, unknown function	N/A	76857
PF3D7_0727400	1.80493	1.16847	0	1	1	proteasome subunit alpha type-5, putative	N/A	28388
PF3D7_0917900	1.61456	1.15666	0	1	1	heat shock protein 70	BIP	72388
PF3D7_0831400	0.300849	1.15639	0	1	1	Plasmodium exported protein, unknown function	N/A	36413
PF3D7_1335100	-0.705661	1.15156	0	1	1	merozoite surface protein 7	MSP7	41276
PF3D7_0316600	1.57797	1.14065	0	1	1	formate-nitrite transporter	FNT	34458
PF3D7_0301700	1.67091	1.13812	0	1	1	EMP1 trafficking protein PTP7	PTP7	37389
PF3D7_0217500	1.39404	1.1319	0	1	1	calcium-dependent protein kinase 1	CDPK1	60800
PF3D7_0936000	1.2537	1.13144	0	1	1	ring-exported protein 2	REX2	10771
PF3D7_1034900	1.21483	1.13014	0	1	1	methionine--tRNA ligase	MRScyt	104168
PF3D7_1015600	0.62677	1.1257	0	1	1	heat shock protein 60	HSP60	62551
PF3D7_0419600	1.20785	1.12345	0	1	1	ran-specific GTPase-activating protein 1, putative	RANBP1	33196
PF3D7_0801000	0.27177	1.10555	0	1	1	Plasmodium exported protein (PHISTc)	N/A	147069
PF3D7_0320300	1.11122	1.09295	0	1	1	T-complex protein 1 subunit epsilon	CCT5	59176
PF3D7_1434300	1.22891	1.08671	0	1	1	Hsp70/Hsp90 organizing protein	HOP	66057
PF3D7_1105100	1.34713	1.06713	0	1	1	histone H2B	H2B	13125
PF3D7_1470900	1.40378	1.05525	0	1	1	proteasome subunit beta type-2, putative	N/A	22862
PF3D7_0406200	1.29309	1.03285	0	1	1	parasitophorous vacuole membrane protein S16	Pfs16	16626
PF3D7_1350100	1.95944	1.03129	0	1	1	lysine--tRNA ligase	KRS1	67591
PF3D7_0822600	1.13211	1.02914	0	1	1	protein transport protein SEC23	SEC23	86169
PF3D7_1424400	1.72321	1.02723	0	1	1	60S ribosomal protein L7-3, putative	N/A	32681
PF3D7_0621800	1.40726	1.0139	0	1	1	nascent polypeptide-associated complex subunit alpha, putative	N/A	20623
PF3D7_0918000	-0.0859696	1.00949	0	1	1	glideosome-associated protein 50	GAP50	44604
PF3D7_0821700	6.64386	0.997935	1	0	1	60S ribosomal protein L22, putative	N/A	16382
PF3D7_0523400	6.64386	0.970805	1	0	1	DnaJ protein, putative	N/A	61903
PF3D7_1105600	6.64386	0.96009	1	0	1	translocon component PTEX88	PTEX88	90787
PF3D7_1343700	2.20284	0.952038	1	0	1	kelch protein K13	Kelch13	83665
PF3D7_0508300	2.3135	0.950517	1	0	1	triose phosphate transporter	TPT	39040
PF3D7_0919000	3.37606	0.913915	1	0	1	nucleosome assembly protein	NAPS	31827
PF3D7_1353600	6.64386	0.911885	1	0	1	ER lumen protein retaining receptor	ERD2	26447
PF3D7_1012400	3.59448	0.911719	1	0	1	hypoxanthine-guanine phosphoribosyltransferase	HGPRT	26362
PF3D7_0702400	2.65445	0.907955	1	0	1	small exported membrane protein 1	SEMP1	14195
PF3D7_0935800	5.72738	0.902235	1	0	1	cytoadherence linked asexual protein 9	CLAG9	160417
PF3D7_0320700	4.0541	0.898231	1	0	1	signal peptidase complex subunit 2	SPC25	21012
PF3D7_1330400	3.753	0.897797	1	0	1	ER lumen protein retaining receptor 1, putative	N/A	32806
PF3D7_1346100	4.76411	0.897286	1	0	1	protein transport protein SEC61 subunit alpha	SEC61A	52224
PF3D7_1211900	2.50816	0.889104	1	0	1	non-SERCA-type Ca2+ -transporting P-ATPase	ATP4	140262
PF3D7_1438000	3.94493	0.875782	1	0	1	eukaryotic translation initiation factor eIF2A, putative	N/A	76833
PF3D7_1305300	3.35395	0.865728	1	0	1	translational activator GCN1, putative	GCN1	418581
PF3D7_1444300	6.64386	0.864154	1	0	1	1-acyl-sn-glycerol-3-phosphate acyltransferase, putative	LPAAT	33747
PF3D7_1361900	2.28232	0.853439	1	0	1	proliferating cell nuclear antigen 1	PCNA1	30587
PF3D7_1447700	4.30221	0.852567	1	0	1	conserved protein, unknown function	N/A	40695
PF3D7_0626800	2.0836	0.837207	1	0	1	pyruvate kinase	PyrK	55661
PF3D7_1409900	6.64386	0.832571	1	0	1	cytidine diphosphate-diacylglycerol synthase	CDS	77990
PF3D7_1460300	6.64386	0.83013	1	0	1	60S ribosomal protein L29, putative	RPL29	8014
PF3D7_1246800	6.64386	0.819476	1	0	1	signal recognition particle receptor subunit beta, putative	SRPRB	30624
PF3D7_0525800	6.27418	0.808885	1	0	1	inner membrane complex protein 1g	IMC1g	34341
PF3D7_1332900	2.98336	0.805665	1	0	1	isoleucine--tRNA ligase, putative	cyto-IRS	151311
PF3D7_0716800	6.64386	0.801875	1	0	1	eukaryotic translation initiation factor 3 subunit I, putative	EIF3I	37284
PF3D7_1454700	4.50105	0.798524	1	0	1	6-phosphogluconate dehydrogenase, decarboxylating	6PGD	52994
PF3D7_0823800	2.23405	0.793083	1	0	1	DnaJ protein, putative	N/A	76682
PF3D7_1455200	6.64386	0.765688	1	0	1	methyltransferase AAMT	N/A	23990
PF3D7_0903900	2.33688	0.747079	1	0	1	60S ribosomal protein L32	RPL32	15527
PF3D7_0935900	2.3761	0.729441	1	0	1	ring-exported protein 1	REX1	83041
PF3D7_1219100	2.56196	0.72229	1	0	1	clathrin heavy chain, putative	CHC	232950
PF3D7_0317600	3.06049	0.720798	1	0	1	40S ribosomal protein S11, putative	RPS11	18760
PF3D7_1023900	2.1104	0.69341	1	0	1	chromodomain-helicase-DNA-binding protein 1 homolog, putative	CHD1	381254
PF3D7_1143200	3.20098	0.68638	1	0	1	DnaJ protein, putative	N/A	39362
PF3D7_1349200	2.23902	0.684058	1	0	1	glutamate--tRNA ligase	GluRS	101418
PF3D7_0627500	2.09453	0.680086	1	0	1	protein DJ-1	DJ1	20292
PF3D7_1037300	4.99276	0.669062	1	0	1	ADP,ATP carrier protein 1	AAC1	33726
PF3D7_0309600	2.07476	0.658415	1	0	1	60S acidic ribosomal protein P2	PfP2	11948
PF3D7_1028300	2.99426	0.65783	1	0	1	rRNA-processing protein EBP2, putative	EBP2	37727
PF3D7_0302500	2.33288	0.651294	1	0	1	cytoadherence linked asexual protein 3.1	CLAG3.1	167242
PF3D7_1123400	3.28463	0.644386	1	0	1	eukaryotic peptide chain release factor GTP-binding subunit, putative	ERF3	62881
PF3D7_1328300	2.17445	0.642843	1	0	1	conserved protein, unknown function	N/A	38776
PF3D7_0215700	2.66423	0.64132	1	0	1	DNA-directed RNA polymerase II subunit RPB2, putative	RPB2	151723
PF3D7_1020900	4.03633	0.629044	1	0	1	ADP-ribosylation factor 1	ARF1	20912
PF3D7_0402000	3.95445	0.609647	1	0	1	Plasmodium exported protein (PHISTa), unknown function	N/A	49743
PF3D7_1340700	2.24967	0.605143	1	0	1	ras-related protein Rab-11B	RAB11b	25931
PF3D7_1473200	4.24958	0.596501	1	0	1	DnaJ protein, putative	N/A	52454
PF3D7_1033400	6.64386	0.591079	1	0	1	haloacid dehalogenase-like hydrolase	HAD1	32842
PF3D7_0422100	2.84857	0.582602	1	0	1	transmembrane emp24 domain-containing protein, putative	N/A	44930
PF3D7_1429600	3.80727	0.567237	1	0	1	conserved Plasmodium protein, unknown function	GEXP03	26164
PF3D7_1103100	3.7651	0.54735	1	0	1	60S acidic ribosomal protein P1, putative	RPP1	13014
PF3D7_1469200	6.64386	0.530477	1	0	1	shewanella-like protein phosphatase 1, putative	SHLP1	42326
PF3D7_1474600	2.44272	0.520505	1	0	1	vacuole membrane protein 1, putative	VMP1	46190
PF3D7_1355800	6.64386	0.516374	1	0	1	splicing factor 3B subunit 5, putative	SF3B5	10110
PF3D7_0415900	3.31316	0.512286	1	0	1	60S ribosomal protein L15, putative	N/A	24134
PF3D7_0501200	4.25187	0.510921	1	0	1	parasite-infected erythrocyte surface protein	PIESP2	48721
PF3D7_0606700	2.30667	0.50711	1	0	1	coatomer alpha subunit, putative	N/A	176946
PF3D7_1121600	2.69971	0.50428	1	0	1	exported protein 1	EXP1	17296
PF3D7_1435400	3.98186	0.498084	1	0	1	ER membrane protein complex subunit 4, putative	EMC4	21835
PF3D7_0503400	6.64386	0.495763	1	0	1	actin-depolymerizing factor 1	ADF1	13741
PF3D7_0308200	2.2825	0.494947	1	0	1	T-complex protein 1 subunit eta	CCT7	59577
PF3D7_0811600	2.70127	0.450375	1	0	1	protein MAP1, putative	N/A	144008
PF3D7_1457300	2.73649	0.450196	1	0	1	MA3 domain-containing protein, putative	N/A	75987
PF3D7_0406100	2.03276	0.431018	1	0	1	V-type proton ATPase subunit B	N/A	55789
PF3D7_0306800	2.3978	0.422873	1	0	1	T-complex protein 1 subunit beta	CCT2	59199
PF3D7_1130100	2.27645	0.412111	1	0	1	60S ribosomal protein L38	RPL38	10314
PF3D7_1459400	4.34935	0.409292	1	0	1	conserved protein, unknown function	N/A	40069
PF3D7_0608800	3.01452	0.408854	1	0	1	ornithine aminotransferase	OAT	46055
PF3D7_0316800	4.59044	0.398105	1	0	1	40S ribosomal protein S15A, putative	N/A	14874
PF3D7_1126200	3.1454	0.379607	1	0	1	40S ribosomal protein S18, putative	RPS18	17891
PF3D7_1432100	3.86117	0.339211	1	0	1	voltage-dependent anion-selective channel protein	VAC	33267
PF3D7_1437200	2.57061	0.320913	1	0	1	ribonucleoside-diphosphate reductase large subunit, putative	N/A	96904
PF3D7_1108400	3.31781	0.305244	1	0	1	casein kinase 2, alpha subunit	CK2alpha	39890
PF3D7_1410600	2.83527	0.28037	1	0	1	eukaryotic translation initiation factor 2 subunit gamma, putative	eIF2gamma	51245
PF3D7_1027300	2.15587	0.261523	1	0	1	peroxiredoxin	nPrx	43930
PF3D7_1338200	2.01684	0.251191	1	0	1	60S ribosomal protein L6, putative	RPL6	25532
PF3D7_1324900	2.05168	0.24413	1	0	1	L-lactate dehydrogenase	LDH	34108
PF3D7_1317800	3.10646	0.23966	1	0	1	40S ribosomal protein S19	RPS19	16764
PF3D7_0904700	6.64386	0.227907	1	0	1	bacterial histone-like protein	HU	22515
PF3D7_0819900	6.64386	0.225852	1	0	1	U6 snRNA-associated Sm-like protein LSm3, putative	LSM3	10701
PF3D7_1132800	3.11239	0.219454	1	0	1	aquaglyceroporin	AQP	28297
PF3D7_1462300	2.73527	0.210156	1	0	1	GTP-binding protein, putative	N/A	161219
PF3D7_1115600	2.50156	0.203867	1	0	1	peptidyl-prolyl cis-trans isomerase	CYP19B	21731
PF3D7_1341300	4.71873	0.163379	1	0	1	60S ribosomal protein L18-2, putative	N/A	21454
PF3D7_0503800	3.87022	0.133895	1	0	1	60S ribosomal protein L31	RPL31	14065
PF3D7_0517300	2.61688	0.116017	1	0	1	serine/arginine-rich splicing factor 1	SR1	34561
PF3D7_0513800	6.64386	0.108596	1	0	1	ras-related protein Rab-1A	RAB1a	23859
PF3D7_0520000	2.74185	0.0847516	1	0	1	40S ribosomal protein S9, putative	RPS9	22123
PF3D7_0936800	2.65422	0.0802711	1	0	1	Plasmodium exported protein (PHISTc), unknown function	N/A	45500
PF3D7_0525100	2.99082	0.0491097	1	0	1	acyl-CoA synthetase	ACS10	76852
PF3D7_0826700	2.21656	0.0462217	1	0	1	receptor for activated c kinase	RACK1	35686
PF3D7_0814000	2.91604	0.027271	1	0	1	60S ribosomal protein L13-2, putative	N/A	25441
PF3D7_1408600	2.29476	-0.00675737	1	0	1	40S ribosomal protein S8e, putative	N/A	25051
PF3D7_0416800	2.3891	-0.0953612	1	0	1	small GTP-binding protein sar1	SAR1	22020
PF3D7_1350200	6.64386	-0.13688	1	0	1	small nuclear ribonucleoprotein E, putative	SNRPE	10927
PF3D7_0922500	2.21822	-0.180459	1	0	1	phosphoglycerate kinase	PGK	45427
PF3D7_1222700	3.0286	-0.261197	1	0	1	glideosome-associated protein 45	GAP45	23632
PF3D7_0319600	2.7324	-0.297486	1	0	1	elongation factor 1-delta, putative	EF-1delta	17706
PF3D7_1445900	2.75033	-0.334988	1	0	1	ATP-dependent RNA helicase DDX17	DDX17	60036
PF3D7_1312900	4.55715	-0.748535	1	0	1	eukaryotic translation initation factor 4 gamma	EIF4G	146647
PF3D7_0806800	2.72356	-0.761973	1	0	1	V-type proton ATPase subunit a, putative	N/A	122999
PF3D7_1439600	6.64386	-0.928374	1	0	1	cytochrome c oxidase subunit NDUFA4, putative	NDUFA4	22559
PF3D7_1302800	2.47721	-1.11565	1	0	1	40S ribosomal protein S7, putative	N/A	22481
PF3D7_1474800	1.70293	0.9976	0	0	0	proteasome subunit alpha type-1, putative	N/A	28838
PF3D7_1460700	0.932204	0.977642	0	0	0	60S ribosomal protein L27	RPL27	16745
PF3D7_1419700	1.91462	0.972948	0	0	0	eukaryotic translation initiation factor 3 subunit H, putative	EIF3H	59693
PF3D7_0212300	-0.172995	0.966834	0	0	0	eukaryotic peptide chain release factor subunit 1, putative	ERF1	48064
PF3D7_1452000	1.38267	0.958295	0	0	0	rhoptry neck protein 2	RON2	249487
PF3D7_0926400	1.0515	0.955638	0	0	0	monocarboxylate transporter, putative	N/A	60708
PF3D7_0807300	1.16238	0.952135	0	0	0	ras-related protein Rab-18	RAB18	23163
PF3D7_0532100	1.14724	0.949853	0	0	0	early transcribed membrane protein 5	ETRAMP5	19030
PF3D7_1231100	1.6521	0.932494	0	0	0	ras-related protein Rab-2	RAB2	24424
PF3D7_1311800	1.59562	0.91472	0	0	0	M1-family alanyl aminopeptidase	M1AAP	126062
PF3D7_0721600	0.981916	0.908884	0	0	0	40S ribosomal protein S5, putative	N/A	21863
PF3D7_1426000	1.39445	0.905951	0	0	0	60S ribosomal protein L21	RPL21	18795
PF3D7_0517000	0.415418	0.902368	0	0	0	60S ribosomal protein L12, putative	N/A	18112
PF3D7_1444800	1.38955	0.875379	0	0	0	fructose-bisphosphate aldolase	FBPA	40105
PF3D7_0705400	-1.18216	0.819633	0	0	0	DNA replication licensing factor MCM7	MCM7	94237
PF3D7_0818900	1.04513	0.813295	0	0	0	heat shock protein 70	HSP70	73915
PF3D7_0217900	1.41708	0.80364	0	0	0	thioesterase/thiol ester dehydrase-isomerase, putative	N/A	60598
PF3D7_0511800	1.14735	0.785603	0	0	0	inositol-3-phosphate synthase	INO1	69112
PF3D7_1248900	-0.274233	0.772079	0	0	0	26S protease regulatory subunit 8, putative	RPT6	49545
PF3D7_0520900	1.85534	0.763778	0	0	0	adenosylhomocysteinase	SAHH	53839
PF3D7_1011800	0.994319	0.762517	0	0	0	PRE-binding protein	PREBP	131626
PF3D7_1428300	-0.360972	0.76197	0	0	0	proliferation-associated protein 2g4, putative	N/A	42641
PF3D7_0929400	1.68657	0.758878	0	0	0	high molecular weight rhoptry protein 2	RhopH2	162665
PF3D7_0821800	0.377455	0.758857	0	0	0	protein transport protein SEC61 subunit beta, putative	SEC61B	8630
PF3D7_0624000	1.8923	0.75679	0	0	0	hexokinase	HK	55261
PF3D7_0827900	0.539867	0.755572	0	0	0	protein disulfide-isomerase	PDI8	55514
PF3D7_1451800	0.466975	0.751861	0	0	0	sortilin	SORTLR	102270
PF3D7_0706000	1.36609	0.749497	0	0	0	importin-7, putative	N/A	145509
PF3D7_1036900	0.600626	0.740894	0	0	0	conserved Plasmodium protein, unknown function	N/A	192685
PF3D7_1142600	1.27504	0.735239	0	0	0	60S ribosomal protein L35ae, putative	N/A	16265
PF3D7_0520400	0.192598	0.732222	0	0	0	single-stranded DNA-binding protein, putative	N/A	35659
PF3D7_1127000	1.85551	0.719469	0	0	0	protein phosphatase, putative	N/A	34461
PF3D7_0205900	0.287811	0.716576	0	0	0	26S proteasome regulatory subunit RPN1, putative	RPN1	108358
PF3D7_0708800	0.835081	0.710211	0	0	0	heat shock protein 110	HSP110c	99964
PF3D7_0807500	1.38344	0.709742	0	0	0	proteasome subunit alpha type-6, putative	N/A	29500
PF3D7_0307100	1.41466	0.709137	0	0	0	40S ribosomal protein S12, putative	RPS12	15396
PF3D7_0722400	1.73213	0.704474	0	0	0	Obg-like ATPase 1, putative	OLA1	45164
PF3D7_0627700	0.831786	0.69914	0	0	0	transportin	N/A	132838
PF3D7_1252100	1.60314	0.698085	0	0	0	rhoptry neck protein 3	RON3	263155
PF3D7_1124600	0.184397	0.682725	0	0	0	ethanolamine kinase	EK	49914
PF3D7_1439900	0.310005	0.678174	0	0	0	triosephosphate isomerase	TIM	27935
PF3D7_0103900	0.86433	0.673336	0	0	0	parasite-infected erythrocyte surface protein	PIESP15	67802
PF3D7_1229400	-0.298508	0.661509	0	0	0	macrophage migration inhibitory factor	MIF	12845
PF3D7_1368100	1.73191	0.6575	0	0	0	26S proteasome regulatory subunit RPN11, putative	RPN11	35212
PF3D7_0207600	0.963054	0.641753	0	0	0	serine repeat antigen 5	SERA5	111768
PF3D7_1437900	0.470806	0.638384	0	0	0	HSP40, subfamily A	HSP40	48469
PF3D7_1407900	1.19698	0.62061	0	0	0	plasmepsin I	PMI	51461
PF3D7_1366900	-0.36102	0.58819	0	0	0	conserved protein, unknown function	N/A	78574
PF3D7_1228600	1.4001	0.580215	0	0	0	merozoite surface protein 9	MSP9	86623
PF3D7_1462800	1.42138	0.574151	0	0	0	glyceraldehyde-3-phosphate dehydrogenase	GAPDH	36635
PF3D7_0532400	1.26883	0.57324	0	0	0	lysine-rich membrane-associated PHISTb protein	LyMP	61086
PF3D7_1222300	0.322603	0.567251	0	0	0	endoplasmin, putative	GRP94	95018
PF3D7_1407100	0.405863	0.554265	0	0	0	rRNA 2'-O-methyltransferase fibrillarin, putative	NOP1	34129
PF3D7_0813900	0.856246	0.553988	0	0	0	40S ribosomal protein S16, putative	RPS16	16285
PF3D7_1454400	0.723509	0.553065	0	0	0	aminopeptidase P	APP	90130
PF3D7_0905400	1.77406	0.542671	0	0	0	high molecular weight rhoptry protein 3	RhopH3	104856
PF3D7_0708400	0.900439	0.539757	0	0	0	heat shock protein 90	HSP90	86166
PF3D7_1229500	1.60347	0.530959	0	0	0	T-complex protein 1 subunit gamma	CCT3	60662
PF3D7_1236100	1.24891	0.525047	0	0	0	clustered-asparagine-rich protein	CARP	51533
PF3D7_1412300	0.793482	0.524824	0	0	0	nuclear transport factor 2, putative	NTF2	14438
PF3D7_0618300	1.08794	0.519819	0	0	0	60S ribosomal protein L27a, putative	N/A	16723
PF3D7_0516200	-0.325833	0.51935	0	0	0	40S ribosomal protein S11	RPS11	16077
PF3D7_0610800	1.1118	0.507973	0	0	0	transketolase	TK	75815
PF3D7_1109900	1.70477	0.504761	0	0	0	60S ribosomal protein L36	RPL36	12787
PF3D7_1012600	1.07598	0.501402	0	0	0	GMP synthase [glutamine-hydrolyzing]	GMPS	63932
PF3D7_1308200	1.41248	0.48377	0	0	0	carbamoyl phosphate synthetase	cpsSII	273438
PF3D7_0500800	1.38205	0.447055	0	0	0	mature parasite-infected erythrocyte surface antigen	MESA	168288
PF3D7_1360800	1.09871	0.445231	0	0	0	falcilysin	FLN	138863
PF3D7_1347500	1.84597	0.441555	0	0	0	DNA/RNA-binding protein Alba 4	ALBA4	42160
PF3D7_1232100	0.55072	0.424701	0	0	0	60 kDa chaperonin	CPN60	81484
PF3D7_1130200	0.425433	0.42222	0	0	0	60S ribosomal protein P0	PfP0	34968
PF3D7_1424100	1.04114	0.412793	0	0	0	60S ribosomal protein L5, putative	RPL5	33998
PF3D7_0413600	1.64586	0.412706	0	0	0	26S protease regulatory subunit 6B, putative	RPT3	44666
PF3D7_1110400	0.807213	0.409557	0	0	0	RNA-binding protein, putative	N/A	173924
PF3D7_0519700	0.609235	0.402717	0	0	0	FoP domain-containing protein, putative	N/A	22734
PF3D7_1342000	1.05014	0.398061	0	0	0	40S ribosomal protein S6	N/A	35384
PF3D7_0903200	0.485305	0.395566	0	0	0	ras-related protein RAB7	RAB7	23788
PF3D7_1446200	0.745785	0.386573	0	0	0	M17 leucyl aminopeptidase	LAP	67821
PF3D7_1117700	0.908952	0.358148	0	0	0	GTP-binding nuclear protein RAN/TC4	RAN	24875
PF3D7_0617900	0.205749	0.355194	0	0	0	histone H3 variant	H3.3	15441
PF3D7_1461300	1.65927	0.349813	0	0	0	40S ribosomal protein S28e, putative	N/A	7494
PF3D7_1008700	1.60019	0.348605	0	0	0	tubulin beta chain	N/A	49751
PF3D7_1308300	0.138484	0.347555	0	0	0	40S ribosomal protein S27	RPS27	9142
PF3D7_1116800	1.02253	0.342477	0	0	0	heat shock protein 101	HSP101	102874
PF3D7_0912500	0.503057	0.337854	0	0	0	SAP domain-containing protein, putative	N/A	33185
PF3D7_0307200	0.892865	0.336915	0	0	0	60S ribosomal protein L7, putative	N/A	30523
PF3D7_1104000	1.19809	0.329829	0	0	0	phenylalanine--tRNA ligase beta subunit	N/A	72502
PF3D7_1426100	0.649397	0.328717	0	0	0	transcription factor BTF3, putative	BTF3	19393
PF3D7_1447000	1.62687	0.32146	0	0	0	40S ribosomal protein S5	N/A	29958
PF3D7_1003600	1.17156	0.318764	0	0	0	inner membrane complex protein 1c	IMC1c	32654
PF3D7_0103200	1.17021	0.313294	0	0	0	nucleoside transporter 4	NT4	50011
PF3D7_1347200	1.34702	0.312897	0	0	0	nucleoside transporter 1	NT1	47631
PF3D7_0912400	-0.402128	0.307875	0	0	0	alkaline phosphatase, putative	N/A	52705
PF3D7_0519400	1.35854	0.290538	0	0	0	40S ribosomal protein S24	RPS24	15391
PF3D7_1010600	0.868325	0.282511	0	0	0	eukaryotic translation initiation factor 2 subunit beta	eIF2beta	25322
PF3D7_1436000	0.753187	0.274109	0	0	0	glucose-6-phosphate isomerase	GPI	67368
PF3D7_0513300	1.9072	0.273572	0	0	0	purine nucleoside phosphorylase	PNP	26858
PF3D7_1239700	0.846001	0.270347	0	0	0	ATP-dependent zinc metalloprotease FTSH 1	FTSH1	100958
PF3D7_0931800	0.016256	0.262842	0	0	0	proteasome subunit beta type-6, putative	N/A	32602
PF3D7_1451100	1.46938	0.261748	0	0	0	elongation factor 2	eEF2	93523
PF3D7_0501500	1.43987	0.259139	0	0	0	rhoptry-associated protein 3	RAP3	47004
PF3D7_1015900	0.865354	0.250752	0	0	0	enolase	ENO	48678
PF3D7_1026800	1.30049	0.243982	0	0	0	40S ribosomal protein S2	RPS2	29856
PF3D7_0813300	1.39423	0.243681	0	0	0	NPL domain-containing protein, putative	N/A	36256
PF3D7_0812500	-0.0355037	0.227299	0	0	0	RNA-binding protein, putative	N/A	117080
PF3D7_0517700	1.82851	0.224219	0	0	0	eukaryotic translation initiation factor 3 subunit B, putative	EIF3B	84057
PF3D7_1224300	1.03454	0.210782	0	0	0	polyadenylate-binding protein 1, putative	PABP1	97230
PF3D7_0619400	1.61655	0.199781	0	0	0	cell division cycle protein 48 homologue, putative	N/A	92387
PF3D7_0422400	1.0446	0.172518	0	0	0	40S ribosomal protein S19	RPS19	19722
PF3D7_0320900	0.579465	0.170266	0	0	0	histone H2A.Z	H2A.Z	16453
PF3D7_1441400	1.38342	0.165955	0	0	0	FACT complex subunit SSRP1, putative	FACT-S	58787
PF3D7_1410400	0.714392	0.163757	0	0	0	rhoptry-associated protein 1	RAP1	90053
PF3D7_1007900	0.732273	0.155379	0	0	0	eukaryotic translation initiation factor 3 subunit D, putative	EIF3D	63110
PF3D7_0930300	0.631209	0.154478	0	0	0	merozoite surface protein 1	MSP1	195726
PF3D7_1358800	1.09699	0.143336	0	0	0	40S ribosomal protein S15	RPS15	17250
PF3D7_0916700	-0.0926752	0.139655	0	0	0	RNA-binding protein musashi, putative	HoMu	45143
PF3D7_0719600	1.93955	0.137952	0	0	0	60S ribosomal protein L11a, putative	N/A	20228
PF3D7_1431700	1.53038	0.13449	0	0	0	60S ribosomal protein L14, putative	N/A	19297
PF3D7_1134000	0.270122	0.114047	0	0	0	heat shock protein 70	HSP70-3	73297
PF3D7_0507100	0.323951	0.110314	0	0	0	60S ribosomal protein L4	RPL4	46211
PF3D7_0501600	0.0904409	0.103111	0	0	0	rhoptry-associated protein 2	RAP2	46739
PF3D7_1414800	1.09411	0.101808	0	0	0	small nuclear ribonucleoprotein-associated protein B, putative	SMB1	22332
PF3D7_0922200	0.908108	0.0968087	0	0	0	S-adenosylmethionine synthetase	SAMS	44844
PF3D7_0322900	1.49972	0.0893497	0	0	0	40S ribosomal protein S3A, putative	RPS3A	30047
PF3D7_0614500	1.84608	0.0864623	0	0	0	60S ribosomal protein L19	RPL19	21580
PF3D7_0516900	0.0417751	0.0780584	0	0	0	60S ribosomal protein L2	RPL2	28000
PF3D7_1002100	1.77179	0.0773743	0	0	0	EMP1-trafficking protein	PTP5	69851
PF3D7_1120100	0.293865	0.06366	0	0	0	phosphoglycerate mutase, putative	PGM1	28770
PF3D7_0306300	-0.0916643	0.0600058	0	0	0	glutaredoxin 1	GRX1	12418
PF3D7_0629200	0.181976	0.0586569	0	0	0	DnaJ protein, putative	N/A	44669
PF3D7_1420700	-0.961386	0.0549208	0	0	0	surface protein P113	P113	112574
PF3D7_1344200	1.78139	0.0545518	0	0	0	endoplasmic reticulum chaperone GRP170	GRP170	108185
PF3D7_0527000	0.714905	0.0336242	0	0	0	DNA replication licensing factor MCM3, putative	MCM3	109798
PF3D7_0315100	1.4597	0.00621493	0	0	0	eukaryotic translation initiation factor 4E	eIF4E	26948
PF3D7_1105000	0.866481	-0.0320112	0	0	0	histone H4	H4	11456
PF3D7_1013300	0.963604	-0.0460827	0	0	0	Nicalin domain-containing protein	N/A	75469
PF3D7_1309100	0.0434703	-0.0535622	0	0	0	60S ribosomal protein L24, putative	N/A	19245
PF3D7_0607000	1.0237	-0.0664976	0	0	0	translation initiation factor IF-2, putative	N/A	112358
PF3D7_1126000	-0.00787602	-0.0861206	0	0	0	threonine--tRNA ligase	ThrRS	119546
PF3D7_1033200	0.323837	-0.0981946	0	0	0	early transcribed membrane protein 10.2	ETRAMP10.2	38926
PF3D7_0322000	0.791113	-0.0982867	0	0	0	peptidyl-prolyl cis-trans isomerase	CYP19A	18953
PF3D7_0608500	1.95942	-0.110874	0	0	0	proteasome subunit alpha type-2, putative	N/A	26528
PF3D7_1104400	0.877721	-0.144657	0	0	0	thioredoxin-like mero protein	Trx-mero	49266
PF3D7_1438900	1.07586	-0.146954	0	0	0	thioredoxin peroxidase 1	Trx-Px1	21807
PF3D7_0621200	0.819938	-0.151114	0	0	0	pyridoxine biosynthesis protein PDX1	PDX1	33013
PF3D7_0517400	1.446	-0.152127	0	0	0	FACT complex subunit SPT16, putative	FACT-L	132682
PF3D7_0923900	-0.533918	-0.161221	0	0	0	polyadenylate-binding protein 2, putative	PABP2	22979
PF3D7_0401800	1.74892	-0.170073	0	0	0	Plasmodium exported protein (PHISTb), unknown function	PfD80	60270
PF3D7_0913200	0.503752	-0.179098	0	0	0	elongation factor 1-beta	EF-1beta	32027
PF3D7_0814200	-0.331414	-0.191907	0	0	0	DNA/RNA-binding protein Alba 1	ALBA1	27259
PF3D7_0707300	1.33207	-0.195111	0	0	0	rhoptry-associated membrane antigen	RAMA	103641
PF3D7_1346300	0.563377	-0.21331	0	0	0	DNA/RNA-binding protein Alba 2	ALBA2	24984
PF3D7_1015800	0.535882	-0.244128	0	0	0	ribonucleoside-diphosphate reductase small chain, putative	N/A	40388
PF3D7_1366500	-0.151321	-0.256608	0	0	0	nucleoside diphosphate kinase	NDK	17012
PF3D7_0211800	-0.850723	-0.305223	0	0	0	asparagine--tRNA ligase	AsnRS	70498
PF3D7_0803800	1.84583	-0.308312	0	0	0	proteasome subunit beta type-4	N/A	30872
PF3D7_1027800	1.40663	-0.321458	0	0	0	60S ribosomal protein L3	RPL3	44221
PF3D7_1105400	1.28469	-0.329756	0	0	0	40S ribosomal protein S4, putative	RPS4	29772
PF3D7_1004400	1.24232	-0.330722	0	0	0	RNA-binding protein, putative	N/A	106298
PF3D7_0102200	0.132367	-0.349367	0	0	0	ring-infected erythrocyte surface antigen	RESA	126521
PF3D7_1242700	0.784202	-0.351734	0	0	0	40S ribosomal protein S17, putative	N/A	16067
PF3D7_1441200	0.0243461	-0.351878	0	0	0	60S ribosomal protein L1, putative	N/A	24805
PF3D7_0113000	0.484404	-0.355861	0	0	0	glutamic acid-rich protein GARP	GARP	79795
PF3D7_0719700	-0.583077	-0.413238	0	0	0	40S ribosomal protein S10, putative	RPS10	16478
PF3D7_1006200	0.987173	-0.422364	0	0	0	DNA/RNA-binding protein Alba 3	ALBA3	11977
PF3D7_1331800	0.672718	-0.469592	0	0	0	60S ribosomal protein L23, putative	N/A	14993
PF3D7_1427900	-0.076233	-0.472841	0	0	0	leucine-rich repeat protein	N/A	33006
PF3D7_1205600	-0.89519	-0.473156	0	0	0	tetratricopeptide repeat protein, putative	N/A	39018
PF3D7_0721400	0.953239	-0.47748	0	0	0	rhoptry protein, putative	N/A	24792
PF3D7_0714000	1.10003	-0.501269	0	0	0	histone H2B variant	H2B.Z	13763
PF3D7_1414300	1.91225	-0.501381	0	0	0	60S ribosomal protein L10, putative	N/A	25216
PF3D7_0206800	0.32644	-0.503148	0	0	0	merozoite surface protein 2	MSP2	27957
PF3D7_1226300	-0.238133	-0.739225	0	0	0	haloacid dehalogenase-like hydrolase, putative	HAD2	33268
PF3D7_1465900	-0.592026	-0.745388	0	0	0	40S ribosomal protein S3	N/A	24668
PF3D7_1341200	0.8232	-0.791116	0	0	0	60S ribosomal protein L18, putative	N/A	21746
PF3D7_1306400	1.11193	-0.800065	0	0	0	26S protease regulatory subunit 10B, putative	RPT4	44677
PF3D7_1345100	-1.46038	-0.901383	0	0	0	thioredoxin 2	TRX2	18630
PF3D7_1220900	-0.0603184	-0.917244	0	0	0	heterochromatin protein 1	HP1	31018
PF3D7_1203700	-1.25294	-1.07219	0	0	0	nucleosome assembly protein	NAPL	40488
PF3D7_1333400	0.463366	-1.14986	0	0	0	AMMECR1 domain-containing protein, putative	N/A	30891
PF3D7_1008400	-2.8866	-1.16107	0	0	0	26S protease regulatory subunit 4, putative	RPT2	49839
PF3D7_1301700	0.209064	-1.22978	0	0	0	CX3CL1-binding protein 2	CBP2	28255
PF3D7_0717700	0.449792	-1.23434	0	0	0	serine--tRNA ligase, putative	N/A	62454
PF3D7_1324700	1.30766	-1.47253	0	0	0	SNARE protein, putative	YKT6.2	25747
PF3D7_0219400	-1.69461	-1.7892	0	0	0	ribosome associated membrane protein RAMP4, putative	N/A	11576
PF3D7_0210900	-2.58177	-3.41482	0	0	0	conserved Plasmodium protein, unknown function	N/A	32542
PF3D7_0217800	-3.75209	-4.40343	0	0	0	40S ribosomal protein S26	RPS26	12509

## Sheet: S5_Data
	Delta A550				Concentration	% Activity of control
Concentration	Replicate 1	Replicate 2	Replicate 3		1e-10	96.2462
Control	0.0666	0.0648	0.0563		5e-10	87.2372
1e-10	0.0641	0.0642	0.0588		1e-09	83.1832
5e-10	0.0581	0.0617	0.0589		5e-09	80.3303
1e-09	0.0554	0.0575	0.0561		1e-08	49.2492
5e-09	0.0535	0.0499	0.0489		5e-08	5.25526
1e-09	0.0328	0.0348	0.0377		1e-07	3.3033
5e-08	0.0035	0.0013	0.0017		1e-10	99.0741
1e-07	0.0022	0.001	0.0008		5e-10	95.216
					1e-09	88.7346
					5e-09	77.0062
					1e-08	53.7037
					5e-08	2.00617
					1e-07	1.54321
					1e-10	104.44
					5e-10	104.618
					1e-09	99.6448
					5e-09	86.8561
					1e-08	66.9627
					5e-08	3.01954
					1e-07	1.42096
